1 **Title:**

2 A thorough RNA-seq characterization of the porcine sperm transcriptome and its  
3 seasonal changes

4  
5 M. Gòdia<sup>1</sup>, M. Estill<sup>2</sup>, A. Castelló<sup>1,3</sup>, S. Balasch<sup>4</sup>, J.E. Rodríguez-Gil<sup>5</sup>, S.A. Krawetz<sup>2,6,7</sup>,  
6 A. Sánchez<sup>1,3</sup>, A. Clop<sup>1,8\*</sup>

7  
8 1. Animal Genomics Group, Centre for Research in Agricultural Genomics (CRAG)  
9 CSIC-IRTA-UAB-UB, Campus UAB, Cerdanyola del Vallès (Barcelona), Catalonia,  
10 Spain

11 2. Department of Obstetrics and Gynecology, Wayne State University, Detroit,  
12 Michigan, USA.

13 3. Unit of Animal Science, Department of Animal Science and Nutrition, Autonomous  
14 University of Barcelona, Cerdanyola del Vallès (Barcelona), Catalonia, Spain

15 4. Grup Gepork S.A. El Macià, Masies de Roda (Barcelona), Catalonia, Spain

16 5. Unit of Animal Reproduction, Department of Animal Medicine and Surgery,  
17 Autonomous University of Barcelona, Cerdanyola del Vallès (Barcelona), Catalonia,  
18 Spain

19 6. Center for Molecular Medicine and Genetics, Wayne State University, Detroit,  
20 Michigan, USA.

21 7. C.S. Mott Center for Human Growth and Development, Wayne State University,  
22 Detroit, Michigan, USA.

23 8. Consejo Superior de Investigaciones Científicas (CSIC), Barcelona, Catalonia, Spain.

24  
25 \*Corresponding author:

26 Dr. Alex Clop

27 [alex.clop@cragenomica.es](mailto:alex.clop@cragenomica.es)

28  
29  
30 Author's email:

31 Marta Gòdia: [marta.godia@cragenomica.es](mailto:marta.godia@cragenomica.es)

32 Molly Estill: [mestill@med.wayne.edu](mailto:mestill@med.wayne.edu)

33 Anna Castelló: [anna.castello@uab.cat](mailto:anna.castello@uab.cat)

34 Sam Balasch [sbalasch@gepork.es](mailto:sbalasch@gepork.es)

35 Joan E. Rodríguez-Gil: [juanenrique.rodriguez@uab.cat](mailto:juanenrique.rodriguez@uab.cat)

36 Stephen A. Krawetz: [steve@compbio.med.wayne.edu](mailto:steve@compbio.med.wayne.edu)

37 Armand Sánchez: [armand.sanchez@uab.cat](mailto:armand.sanchez@uab.cat)

38 Alex Clop: [alex.clop@cragenomica.es](mailto:alex.clop@cragenomica.es)

39

40

41

42

43

44

45

46

47

48

49

50

51 **Abstract**

52 Understanding the molecular basis of cell function and ultimate phenotypes is crucial  
53 for the development of biological markers. With this aim, several RNA-seq studies have  
54 been devoted to characterize the transcriptome of ejaculated spermatozoa in relation to  
55 sperm quality and fertility. Semen quality follows a seasonal pattern and decays in the  
56 summer months in several animal species. The aim of this study was to deeply profile  
57 the transcriptome of the boar sperm and to evaluate its seasonal changes. We sequenced  
58 the total and the short fractions of the sperm RNA from 10 Pietrain boars, 5 collected in  
59 summer and 5 five sampled in winter, and identified a complex and rich transcriptome  
60 with 4,436 coding genes of moderate to high abundance. Transcript fragmentation was  
61 high but less obvious in genes related to spermatogenesis, chromatin compaction and  
62 fertility. Short non-coding RNAs mostly included piwi-interacting RNAs, transfer  
63 RNAs and micro-RNAs. We also compared the transcriptome of the summer and the  
64 winter ejaculates and identified 34 coding genes and 7 micro-RNAs with a significantly  
65 distinct distribution. These genes were mostly related to oxidative stress, DNA damage  
66 and autophagy. This is the deepest characterization of the boar sperm transcriptome and  
67 the first study linking the transcriptome and the seasonal variability of semen quality in  
68 animals. The annotation described here can be used as a reference for the identification  
69 of markers of sperm quality in pigs.

70

71

72 **Keywords:** sperm, sperm RNA element, RNA-seq, sperm seasonality, transcript  
73 integrity, differential gene expression

74

75

76

77

78

79

80

81

82

83

84

85

86

87

88

89

90

91

92

93

94

95

96

97

98

99

100

## 101 **Introduction**

### 102 **Semen quality is highly relevant for the sustainability of modern pig breeding**

103 Swine, together with poultry, are the most important sources of meat for human  
104 consumption (in kg) worldwide (OECD, 2018). Moreover, the global demand for  
105 animal protein is growing quickly. Thus, improving the efficiency of pork production is  
106 of paramount importance for the sustainability of the sector. Pig production relies on the  
107 genetic merit of boars kept in artificial insemination centers and the quality of their  
108 sperm to disseminate their genetic material. Hence, there is an increasing demand for  
109 molecular markers that afford early prediction of semen quality and fertility in young  
110 boars.

111

### 112 **The sperm cell contains a complex and functionally relevant transcriptome**

113 For decades, the ejaculated mature sperm was considered a dormant cell that only  
114 carried the paternal genome to the egg. Nonetheless, in the recent years the biological  
115 complexity of sperm has become more evident, with the discovery of a rich sperm RNA  
116 population with functional roles in spermatogenesis, fertilization, early embryo  
117 development and transgenerational epigenetic transmission (Gòdia et al., 2018b).  
118 Mature sperm RNAs have been studied by Next Generation Sequencing (NGS) in  
119 several mammalian species including human (Sendler et al., 2013), horse (Das et al.,  
120 2013), mouse (Johnson et al., 2015) and cattle (Selvaraju et al., 2017). These studies  
121 have shown a sperm-specific transcriptome with a large population of transcripts most  
122 of which are present at low levels and are also highly fragmented. The small non-coding  
123 RNA (sncRNA) population of sperm has also been interrogated in several mammals  
124 (Krawetz et al., 2011; Das et al., 2013; Capra et al., 2017), and is composed of a large  
125 and complex repertoire of microRNAs (miRNAs), piwi-interacting RNAs (piRNAs)  
126 and transfer RNAs (tRNAs), among other RNA classes. The abundance of these  
127 transcripts has been proposed as a valuable source of bio-markers for semen quality in  
128 animal breeding and bio-medicine (Jodar et al., 2015; Salas-Huetos et al., 2015; Capra  
129 et al., 2017).

130

### 131 **The boar sperm transcriptome**

132 The boar sperm transcriptome has been interrogated in several studies, most employing  
133 qPCR analysis of target genes. Although qPCR is a useful tool that provides very  
134 valuable information, these studies typically assume transcript integrity and target one  
135 or two exons of only candidate genes. RNA-seq overcomes these two limitations. The  
136 first genome wide evaluation of the boar spermatozoa transcriptome was completed in  
137 2009 by sequencing the 5'-ends of a Expressed Sequence Tag library using Sanger  
138 technology (Yang et al., 2009), which led to the identification of 514 unique sequences  
139 many of which corresponded to unknown genes. High-throughput RNA-seq was more  
140 recently applied to compare two differentially fed boars (Bruggmann et al., 2013) and to  
141 explore the short RNA component of the boar sperm (Luo et al., 2015; Pantano et al.,  
142 2015; Chen et al., 2017a; Chen et al., 2017b). These studies aimed to compare the  
143 sncRNAs at different stages of spermatogenesis or between the different components of  
144 the ejaculate, and concluded that a large proportion of these short RNAs are sperm-  
145 specific. Despite these previous studies, an in-depth analysis of the boar sperm  
146 transcriptome is still missing.

147

### 148 **Sperm quality has a seasonal component**

149 Sperm quality can be influenced by multi-factorial genetics (Marques et al., 2017) and  
150 environmental factors such as stress and seasonality (Wettemann et al., 1976). In pigs, a

151 clear drop on semen quality and male fertility has been observed in the warm summer  
152 months, possibly due to heat stress (Trudeau and Sanford, 1986; Zasiadczyk et al.,  
153 2015). This seasonal effect has been linked to altered levels of some transcripts (Yang et  
154 al., 2010).

155  
156 The first step towards the efficient identification of RNA markers of sperm quality  
157 requires obtaining a profound picture of the boar sperm transcriptome. Our group has  
158 recently optimized a pipeline to extract RNA from swine mature spermatozoa and  
159 obtain a high quality and complete transcriptome profile (Gòdia et al., 2018a). In this  
160 study, we have profiled the sperm transcriptome from 10 boars, including both coding  
161 and non-coding RNAs and we have evaluated the relationship between transcript  
162 abundance and the season of collection (summer versus winter) in the northern  
163 temperate climate zone.

164

165

## 166 **Materials and Methods**

167

### 168 **Sample collection**

169 Specialized professionals obtained fresh ejaculates from 10 Pietrain boars from a  
170 commercial farm, with ages ranging from 9 to 28 months old, between July 2015 and  
171 January 2017 as previously described (Gòdia et al., 2018a). Of the 10 ejaculates, 5 were  
172 collected between December to February, and the other between May and July. No  
173 animal experiment has been performed in the scope of this research.

174

### 175 **RNA extraction, qPCR validation, library prep and sequencing**

176 RNA extraction was performed and the abundances of the sperm specific *PRM1* and the  
177 somatic-cell specific *PTPRC* transcripts as well as the presence of genomic DNA  
178 (gDNA) were measured by qPCR to determine the quality of the obtained RNAs as  
179 previously described by our group (Gòdia et al., 2018a). Extracted RNA was quantified  
180 with Qubit<sup>TM</sup> RNA HS Assay kit (Invitrogen; Carlsbad, USA) and its integrity  
181 validated with Bioanalyzer Agilent RNA 6000 Pico kit (Agilent Technologies; Santa  
182 Clara, USA). Total RNA was subjected to ribosomal RNA depletion with the Ribo-Zero  
183 Gold rRNA Removal Kit (Illumina) and RNA-seq libraries were constructed with the  
184 SMARTer Low Input Library prep kit v2 (Clontech) and sequenced to generate 75 bp  
185 paired-end reads in an Illumina's HiSeq2500 sequencing system. Short RNA-seq  
186 libraries were prepared from the same RNA aliquots (prior to rRNA depletion) with the  
187 NEBNext Small RNA (New England Biolabs) and sequenced in an Illumina HiSeq2000  
188 to produce 50 bp single reads.

189

### 190 **Total RNA-seq mapping and analysis of the Sperm RNA Elements**

191 The quality of the paired end reads were evaluated with FastQC v.0.11.1  
192 (<http://www.bioinformatics.bbsrc.ac.uk/projects/fastqc>), and filtered to remove low  
193 quality reads and adaptors with Trimmomatic v.0.36 (Bolger et al., 2014). Filtered reads  
194 were then mapped to the *S.scrofa* genome (Sscrofa11.1) with HISAT2 v.2.1.0 (Kim et  
195 al., 2015) with default parameters except "--max seeds 30" and "-k 2". Duplicate  
196 mapped reads were removed using Picard Tools (<http://picard.sourceforge.net>)  
197 MarkDuplicates. The uniquely mapped reads were used for the detection and  
198 quantification of Sperm RNA Elements (SREs). SREs are short-size sequences  
199 characterized by a number of RNA-seq reads clustering to a given genomic location  
200 (Jodar et al., 2015; Gòdia et al., 2018b). This approach enables an accurate exon-

201 quantification (or short-size sequence quantification) instead of a whole transcript mean,  
202 which makes it useful for highly degraded tissues such as sperm. After mapping, SREs  
203 are classified as exonic (mapping to annotated exons), intronic, upstream/downstream  
204 10 kb (if located 10 kb upstream or downstream of annotated genes) and orphan  
205 (mapping elsewhere in the genome) (Gòdia et al., 2018b). This classification was done  
206 using the pig Ensembl genome annotation (v.91) extracted with the R package  
207 “BiomaRt” (Durinck et al., 2009). Porcine orphan SREs coordinates were converted to  
208 human (hg38) coordinates and from human to bovine (bosTau8) using the UCSC  
209 liftover tool (Kuhn et al., 2013). The coefficient of variation (CV) of the RNA  
210 abundance across samples was used to classify the transcripts as highly stable (CV >  
211 0.75), moderately stable (CV between 0.25 and 0.75) and highly unstable (CV < 0.25).  
212 Only these genes with all their SREs fitting the same stability class were considered for  
213 the GO analysis.

214

### 215 ***De novo* transcriptome analysis**

216 Reads unmapped to the Sscorfa11.1 genome were screened against the porcine  
217 Transposable Elements from the Repbase database (Bao et al., 2015) using HISAT2  
218 v.2.1.0 (Kim et al., 2015). The remaining unmatched reads were searched against  
219 bacterial and viral genomes using Kraken v.0.10.5 (Wood and Salzberg, 2014) and  
220 removed. The remaining reads were subjected to *de novo* assembly with Trinity v.2.1.0  
221 (Grabherr et al., 2011) using default parameters and databases. The assembled contigs  
222 were quantified with RSEM and only those with identity score > 85%, abundance levels  
223 > 50 FPKM and detected in 5 samples or more were kept.

224

### 225 **Repetitive Elements and long non-coding RNAs**

226 The proportion of reads in Repeat Elements (RE) was calculated with Bedtools  
227 (Quinlan and Hall, 2010) multicov using the RepeatMasker database (Bao et al., 2015).  
228 Read counts were normalized for RE length and sequencing depth. The same approach  
229 was used for long non-coding-RNAs (lncRNAs). Only the lncRNAs annotated in  
230 Ensembl v.91 were used. The coding genes mapping less than 20 kb apart from the  
231 lncRNAs were considered as potential cis-regulated lncRNA targets.

232

### 233 **Transcript Integrity**

234 RNA transcript integrity (TIN) was calculated with RseQC v.2.6.4 (Wang et al., 2012)  
235 using the Ensembl v.91 pig annotation. TIN indicates the proportion of a gene that is  
236 covered by reads. As an example, TIN = 100 indicates a fully covered transcript.  
237 Transcript abundance was calculated using expression.py from the same software.  
238 Transcript length was calculated based on CDS length, extracted with the R package  
239 “BiomaRt” (Durinck et al., 2009).

240

### 241 **Analysis of the short non-coding RNAs**

242 Trimming of adaptors and low quality bases were performed with Cutadapt v1.0  
243 (Martin, 2011) and evaluated with FastQC v.0.11.1  
244 (<http://www.bioinformatics.bbsrc.ac.uk/projects/fastqc>). The mapping of sncRNAs was  
245 performed with the sRNAtoolbox v.6.17 (Rueda et al., 2015) with default settings and  
246 giving as library datasets: tRNA database (Chan and Lowe, 2016), miRBase (Kozomara  
247 and Griffiths-Jones, 2011) release 21, piRNA database (Rosenkranz, 2016) and Mt  
248 tRNA, Mt rRNA, snRNA, snoRNA, lincRNA, CDS and ncRNAs from Ensembl v.91.  
249 Multi-adjusted read counts were then normalized by sequencing depth. We only  
250 considered the miRNAs that were detected in all the samples processed. To determine if



251 piRNAs were located in RE, the overlap between REs and the piRNA clusters that were  
252 shared in at least 3 samples was checked with Bedtools (Quinlan and Hall, 2010)  
253 multicov using the RepeatMasker database (Bao et al., 2015). The short RNA-seq reads  
254 that did not align to any of the datasets provided were used for the *de novo* piRNA  
255 annotation using ProTRAC v.2.4.0 (Rosenkranz and Zischler, 2012) and forcing a  
256 piRNA length between 26 and 33 bp and a default minimum cluster length of 5 kb. We  
257 then kept only these putative novel clusters that were shared in at least 3 of the sperm  
258 samples.

259

### 260 **Analysis of the seasonal variation of the boar sperm transcriptome**

261 We studied the potential seasonal effect of the sperm transcriptome by comparing the  
262 summer (N=5) and the winter (N=5) ejaculates. Total RNA-seq analysis was performed  
263 for the transcripts annotated in the pig genome. We quantified RNA abundance with the  
264 software StringTie (Pertea et al., 2015). Transcript counts were then used for the  
265 differential analysis after correcting for the sequencing run using the R package DESeq2  
266 (Love et al., 2014) correcting for sequencing run batch. Similarly, the identification of  
267 differential miRNAs was also carried with DESeq2 (Love et al., 2014). We only  
268 considered the differentially abundant transcripts and miRNAs with adjusted FDR  
269 values < 0.05 and FC > 1.5. Gene Ontology enrichment was performed with Cytoscape  
270 v.2.3.0 plugin ClueGO v.2.3.5 (Bindea et al., 2009) with the porcine dataset and default  
271 settings, only significant corrected p-values with Bonferroni were considered.

272

273

## 274 **Results and Discussion**

275

### 276 **Total RNA-seq analysis: characterization of sperm RNA elements**

277 RNA extraction yielded an average of 2.1 fg per cell (Supplementary File 1). These  
278 RNAs were devoid of intact ribosomal 18S and 28S RNA and were free of gDNA and  
279 RNA from somatic cell origin [22]. On average, the total RNA-seq libraries yielded  
280 29.5 M paired-end reads (Supplementary File 1). A total of 81.3% of the reads that  
281 passed the quality control filter mapped unambiguously to the pig genome  
282 (Supplementary File 1). After duplicate removal, a mean of 5.6 M reads per sample  
283 were obtained, resulting in a percentage of unique reads similar to recent data on human  
284 sperm (unpublished results). These reads were used for further analysis and yielded  
285 185,037 SREs (see the Methods section) (Gòdia et al., 2018b). Most SREs were present  
286 at low abundances but the 10% most abundant (top decile) SREs accounted for 65% of  
287 the read count with RNA levels ranging between 83 and 378,512 RPKM (Figure 1).  
288 Most of these top decile SREs were exonic (Supplementary File 2). Notably, the  
289 majority (65%) of the intronic and upstream/downstream 10 kb SREs mapped in or near  
290 genes that also harbored exonic SREs. The exonic, intronic and the  
291 upstream/downstream 10 kb top decile SREs (see the Methods) mapped in or near 4,436  
292 annotated genes, which were thus considered to be abundant in the boar sperm  
293 transcriptome (Supplementary File 2). The top decile SREs also included 2,667 orphan  
294 SREs (SREs located more than 10 kb apart from the closest annotated gene)  
295 (Supplementary File 2). However, nearly 30% of the orphan SREs mapped within 30 kb  
296 from the closest gene, which indicates that, as the novel upstream/downstream 10 kb  
297 SREs, they may represent unannotated exons of these genes. In summary, only 10% of  
298 the top decile SREs were not linked to annotated genes. A recent study carried by Pertea  
299 *et al.* (Pertea et al., 2018) analyzed RNA-seq data from 9,795 human experiments from  
300 the GTEx project and concluded that the human genome annotation incorporates most

301 of the *Homo sapiens* genes but still lacks a large proportion of the splice isoforms.  
302 While this study increased the list of coding genes by only 5%, the catalogue of splice  
303 isoforms grew by 30%. Our data is in line with these recent results and does not only  
304 indicate that the novel annotation of the pig genome annotation incorporates most of the  
305 genes found in sperm but also reveals that there is still a large amount of splice isoforms  
306 to be discovered in this species. Since it is well known that the spermatozoon harbors a  
307 very specific transcriptome, a large proportion of these unannotated isoforms are likely  
308 to be sperm-specific (Sendler et al., 2013; Ma et al., 2014).

309

310 In order to dig further into the porcine sperm transcriptome, we investigated whether the  
311 orphan SRE syntenic regions in human and cattle included additional genes not  
312 annotated in pig. 1,505 and 1,313 SREs overlapped to syntenic regions in human and  
313 bovine, respectively. Forty five of the genes annotated within these regions were  
314 detected in both human and cattle (Supplementary File 3), including *CDYL*, a gene  
315 implicated in spermatid development and *ANXA3*, which protein levels in sperm have  
316 been found altered in men with poor semen compared to men with good sperm quality  
317 (Netherton et al., 2018). Ontology analysis of the 4,436 most abundant genes together  
318 with the 45 orphan SRE orthologs showed an enrichment of the cellular protein  
319 metabolic process (q-val:  $2.7 \times 10^{-12}$ ), macromolecular complex subunit organization (q-  
320 val:  $2.1 \times 10^{-9}$ ), sexual reproduction (q-val:  $6.5 \times 10^{-8}$ ), spermatogenesis (q-val:  $1.2 \times 10^{-6}$ )  
321 and male gamete generation (q-val:  $1.4 \times 10^{-6}$ ), among others (Supplementary File 4).  
322 The transcripts detected in our study are concordant with previous results in human  
323 (Jodar et al., 2016) and bovine (Selvaraju et al., 2017) sperm and included genes related  
324 to fertilization (e.g. *HSPAIL* and *PRSS37*) or spermatogenesis (*ODF2* and *SPATA18*).  
325 The top 30 most abundant annotated protein coding SREs mapped to 27 genes (Table  
326 1), 12 from mitochondrial origin (e.g. *COX1*, *COX2*, *ATP8*, *ATP6*, *COX3*), and 15  
327 encoded in the nuclear genome (e.g. *PRMI*, *OAZ3*, *HSPB9*, *NDUFS4*). The abundance  
328 of mitochondrial genes reflects the high number of mitochondria typically contained in  
329 a spermatozoa cell to provide critical functions for the cell's fertilizing ability including  
330 energy supply, regulation of molecular mechanisms involved in the development of the  
331 capacitation process, production of reactive oxygen species and calcium homeostasis  
332 (Rodriguez-Gil and Bonet, 2016). The 15 nuclear genes included members related to  
333 spermatogenesis, chromatin compaction and embryo development (Sendler et al., 2013;  
334 Selvaraju et al., 2017).

335

### 336 **Total RNA-seq analysis: variance on the SRE abundance**

337 We evaluated the transcripts that contained the 10% most abundant SREs across all  
338 samples and classified them as uniform (coefficient of variation or  $cv < 25\%$ ) or  
339 variable ( $cv > 75\%$ ). This identified 481 genes for which all their SREs were uniformly  
340 represented ( $cv < 25\%$ ) and 276 genes where each SRE was highly variable ( $cv > 75\%$ ).  
341 The list of 481 genes with constant abundance was enriched for several functions  
342 including the regulation of calcium, ATP generation and spermatid development and  
343 differentiation (Supplementary File 5). On the contrary, the highly variable genes were  
344 only enriched for the gene ontology term: single fertilization (zygote formation), which  
345 includes *SPMI*, *AQN-1* and *BSP1* among others (Supplementary File 5). This transcript  
346 variability is in general tolerated because it does not have severe phenotypic  
347 consequences. However, some of these transcripts may incur in a significant impact on  
348 semen quality and/or fertility and they could thus be biomarkers of the boar's  
349 reproductive ability. Thus, it would be worth exploring the relationship between these  
350 genes and reproductive phenotypes in a larger study.

351

352 To further understand the functional relevance of the SRE abundance variability, we  
353 also searched for a potential relationship between this and the likely tissue of origin of  
354 the SRE. According to Jodar *et al.* sperm transcripts can be classified as testes-enriched,  
355 spermatozoa-enriched and seminal fluid-enriched (Jodar *et al.*, 2016). Of the genes  
356 including the top decile SREs, 728, 381 and 448 were testes, spermatozoa and seminal  
357 fluid -enriched, respectively. We found a significant difference between the uniformity  
358 of the SRE abundance of the testes-enriched and the seminal fluid-enriched fractions (p-  
359 value:  $3.6 \times 10^{-4}$ ). The seminal fluid-enriched fraction was more variable. No difference  
360 in variability was found between the SREs of the sperm-enriched and the other fractions  
361 (p-values: 0.18 - 0.20). The lack of statistical difference between the sperm-enriched  
362 and the other fractions may be explained by two facts. On the one hand, a large  
363 proportion of the testes transcripts corresponds to cells belonging to the spermatogenic  
364 lineage. On the other hand, mature spermatozoa takes up seminal plasma RNAs via  
365 seminal exosomes (Vojtech *et al.*, 2014; Jodar *et al.*, 2016).

366

### 367 **Total RNA-seq analysis: Transcript Integrity**

368 Sperm transcripts have been found to be highly fragmented in several mammalian  
369 species (Das *et al.*, 2013; Sendler *et al.*, 2013; Selvaraju *et al.*, 2017; Gòdia *et al.*,  
370 2018a). We sought to investigate whether this fragmentation followed a programmatic  
371 pattern or perhaps was stochastic in the pig. For each annotated transcript, we calculated  
372 the abundance levels (in FPKM) and the TIN. In average, we found 31,287 protein  
373 coding transcripts with FPKM > 0 and TIN values > 0. Most transcripts (55%) were  
374 highly fragmented ( $TIN \leq 25$ ) whilst only 181 were almost intact ( $TIN > 75$ ).  
375 Interestingly, the 10 samples showed similar TIN patterns across transcripts (Pearson  
376 correlation 0.72 - 0.93) (Supplementary File 6). The correlations between TIN and  
377 transcript length and transcript abundance were low (0.16 - 0.20 and 0.17 - 0.24,  
378 respectively) (Supplementary File 6). We then searched for gene ontology enrichment  
379 using the 10% most abundant transcripts within each TIN group. The highly fragmented  
380 group ( $TIN < 25$ ) was enriched for genes related to negative regulation of JNK cascade  
381 ( $q\text{-val} = 1.2 \times 10^{-3}$ ), spindle assembly ( $q\text{-val} = 5.6 \times 10^{-3}$ ), and regulation of DNA repair  
382 ( $q\text{-val} = 4.5 \times 10^{-3}$ ), among others. These results are comparable to a previous study in  
383 human sperm (Sendler *et al.*, 2013), where the most fragmented transcripts were not  
384 enriched for spermatogenesis or fertility functions. On the other hand, no significant  
385 pathways were found in the group of the top 10% most intact transcripts, possibly due  
386 to the low size of this group (18 transcripts), even though it contained genes related to  
387 spermatogenesis (*PRM1*, *OAZ3*, *ACSBG2*), sperm movement (*PRM3*, *SMCP*) or heat  
388 stress response (*HSPB9*) (Table 2). Remarkably, the six aforementioned genes were also  
389 within the most intact transcripts in human sperm (Sendler *et al.*, 2013), thereby  
390 indicating conservation across species and their likely basic function in supporting  
391 sperm development and/or fecundity. Altogether, this indicates that the transcript  
392 fragmentation typically found in sperm may follow a programmatic basis and possible  
393 owe to relevant functions during spermatogenesis or upon fertilization.

394

### 395 **Total RNA-seq analysis: *De novo* transcriptome assembly**

396 We sought to further exploit the RNA-seq data by performing *de novo* assembly of the  
397 reads that did not map to the porcine genome. An average of 5.1 M unmapped reads per  
398 sample were used for the analysis (Supplementary File 1) and aligned into an average of  
399 8,459 contigs per sample, with a median size (N50) of 259 bp (Supplementary File 7).  
400 These contigs were then contrasted by sequence homology against several databases



401 and after filtering (see Methods), resulted in a list of 1,060 proteins from human, cattle,  
402 mouse, pig and other animal species with moderate to high RNA abundance  
403 (Supplementary File 8). Some of the proteins were detected in more than one species  
404 and accounted for a total of 768 unique genes (Supplementary File 9). The majority of  
405 these genes (739) were already present in the porcine annotation whilst 29 were  
406 classified as novel genes. From the annotated genes, 699 were also detected with our  
407 initial pipeline mapping the SREs to the porcine genome but 40 were only detected by  
408 this *de novo* assembly (Supplementary File 9). The reads that did not map to the genome  
409 but found a gene counterpart in the *de novo* analysis could have remained unmapped  
410 due to three main reasons. They could have either harbor more mismatches than the  
411 maximum allowed for the mapping algorithm, mapped within a repetitive element or,  
412 simply correspond to segments not assembled in the current version of the porcine  
413 genome. These three scenarios could involve full genes or just gene segments. The 40  
414 known genes detected only by the *de novo* assembly together with the 29 potential  
415 novel genes did not cluster into any GO biological process. However, some of these  
416 genes have been associated to spermatogenesis or implicated in the sperm structure such  
417 as the sperm head or flagellum (e.g. *ACSBG2*, *HSF2BP*, *CCNYL1*, *KNL1* and  
418 *WBP2NL*). These results are in line with the recent study carried in humans by Perea  
419 and co-authors (Pertea et al., 2018) as already detailed in relation to the orphan SREs.  
420 Although the number of novel protein-coding genes represents a modest increase (29  
421 genes), our *de novo* analysis yielded a much higher number (699) potentially novel  
422 splice variants.

423

#### 424 **Total RNA-seq analysis: Repetitive Elements**

425 REs are of particular interest as they comprise a high proportion of the porcine genome  
426 (approximately 40%) often related to genome instability (Bzymek and Lovett, 2001).  
427 Germline cells are very sensitive to the deleterious effects of active transposable  
428 elements. For example, the disruption of Long Interspersed Nuclear Element 1 (LINE1)  
429 retrotransposon silencing, the most abundant RE in the pig genome, can lead to  
430 spermatogenesis aberrations (Gòdia et al., 2018b) and embryo development arrest  
431 (Beraldi et al., 2006). Due to their relevance in spermatozoa, we annotated the RE  
432 segments that were transcribed in the pig sperm. A total of 4.6% of the mapped reads  
433 overlapped with REs, which is in line with previous data in murine sperm (Johnson et  
434 al., 2015), and accounted for 42.8 Mb of the swine genome. The most enriched RE  
435 classes included simple repeats (2.58% of the total mapped reads) which could  
436 potentially correspond to porcine nuclear matrix associated RNAs (Johnson et al.,  
437 2015). The second most abundant REs were the short Interspersed Nuclear Elements  
438 (SINEs) which accounted for 0.6% of the total read abundance. SINEs are transposable  
439 elements that can be hypo-methylated and can regulate male germ cell development,  
440 sperm packaging and embryo development (Schmid et al., 2001). In pigs, LINE1  
441 accounts for 16.8% of the genome space and in our study, 0.19% of the mapped reads  
442 overlapped with LINE1 segments and spanned 25.5 Mb of the genome. This is nearly  
443 ten times less than in mice (1.89%) (Johnson et al., 2015) even though LINE1 is just  
444 slightly more ubiquitous in the murine genome (20%) (Waterston et al., 2002). While  
445 potentially interesting, these differences may arise due to yet unknown species-specific  
446 biological particularities or technical differences in the library preparation and/or  
447 bioinformatics methods used in both studies.

448

#### 449 **Total RNA-seq analysis: long non-coding RNAs**

450 lncRNAs are regulatory RNAs above 200 bp long implicated in a plethora of functions,  
451 including spermatogenesis and reproduction (Gòdia et al., 2018b). Sperm lncRNAs  
452 have been reported in human (Sendler et al., 2013), mice (Zhang et al., 2017) and cattle  
453 (Selvaraju et al., 2017). We identified 27 of the 361 lncRNA annotated in Ensembl v.91,  
454 and their RNA levels were clearly below their coding SREs counterparts  
455 (Supplementary File 10). The predicted cis-regulated target genes included *ZNF217*,  
456 which is a transcriptional repressor, *DYNLRB2* which encodes for a protein belonging to  
457 the dynein family of axoneme components related to sperm motility and *YIPF5*, which  
458 caused infertility in a knock-out fruitfly model (Yu et al., 2015). The annotation of  
459 lncRNAs in the swine genome remains remarkably poor and here we provide an initial  
460 catalogue that is still incomplete.

461

### 462 **Short RNA-seq analysis**

463 On average, 6.6 M reads were obtained for each short RNA-seq library. A mean of 83%  
464 of these reads aligned to the queried porcine (*Sus scrofa*) databases (Supplementary File  
465 1). A total of 34% of the aligned reads corresponded to sncRNAs, mainly piRNAs (37%  
466 of the sncRNA fraction), tRNAs (22.6%) and miRNAs (20.2%) (Figure 2 (A);  
467 Supplementary File 11). The remaining aligned reads (66%) mostly belonged to  
468 mitochondrial transfer and ribosomal RNAs (51%) but also to nuclear protein coding  
469 genes (Supplementary File 11).

470

471 The functional relevance of miRNAs, piRNAs and tRNAs in sperm biology and fertility  
472 (Krawetz et al., 2011; Gòdia et al., 2018b), (Sharma et al., 2016) is well known.  
473 miRNAs are a class of sncRNAs that have been found in multiple cell types and  
474 involved in a plethora of phenotypes and diseases. They post-transcriptionally repress  
475 the translation of target messenger RNAs (mRNAs) and can be ideal biomarkers for  
476 many traits including sperm quality and fertility. We detected 105 miRNAs (annotated  
477 in the pig) that were present in all the samples, with an average abundance that ranged  
478 from 4.6 to 13,192.2 counts per million (CPMs). Chen and colleagues (Chen et al.,  
479 2017a) detected a larger number of miRNAs (140), 75 of which were also detected in  
480 our experiment, in a RNA-seq study using 3 pooled pig sperm samples (Supplementary  
481 File 12). The reduced number of miRNAs described in our work is somewhat not  
482 surprising as we only considered those miRNAs that were present in the 10 samples.  
483 The inter-species comparison also indicates a degree of conservation in the miRNA  
484 composition of the mammalian sperm with about 70% of the miRNAs shared in cattle  
485 (Capra et al., 2017) and human (Pantano et al., 2015) (Supplementary File 12). These  
486 results suggest a conserved functional role of these miRNAs in mammals. The most  
487 abundant miRNAs in our study, miR-34c, miR-191, miR-30d, miR-10b and let-7a,  
488 among others (Supplementary File 13), are also highly abundant in cattle (Capra et al.,  
489 2017) and in human (Krawetz et al., 2011; Pantano et al., 2015) sperm. Some of these  
490 miRNAs have been linked to the male's reproductive ability. For example, miR-34c is  
491 crucial for spermatogenesis (Yuan et al., 2015) and has been related to bull fertility  
492 (Fagerlind et al., 2015) and miR-191, miR-30d and miR-10b displayed altered levels in  
493 infertile human patients when compared to healthy controls (Salas-Huetos et al., 2015;  
494 Tian et al., 2017). We then assessed the coefficient of variation (cv) across the sperm  
495 samples to evaluate their abundance stability (Supplementary File 13). Interestingly,  
496 miRNAs showed large variability, 32% of them varied markedly (cv > 75%), including  
497 the highly abundant miR-34c, miR-30c-5p, miR-186 and miR-99a, with none showing  
498 low variability. As previously mentioned, exosome vesicles may also contribute in  
499 modulating the miRNA population of recipient cells. In fact, a recent study identified

500 altered miRNA profiles in seminal plasma exosomes from azoospermic patients  
501 (Barcelo et al., 2018). We did not measure the pairwise correlation between the  
502 abundance of miRNAs and mRNAs because in their canonical function, miRNAs  
503 inhibit translation but have a small impact on the levels of the target mRNAs.

504  
505 piRNAs are a class of 26-32 bp size sncRNAs that interact with Piwi proteins to  
506 contribute important functions to germline development, epigenetic regulation and the  
507 silencing of transposable elements (Gòdia et al., 2018b). We queried a public database  
508 of 501 piRNA clusters identified in pig testes (Rosenkranz, 2016), and found that 300  
509 were represented in boar sperm and covered 5.03 Mb (0.20%) of the Scrofa10.2 genome  
510 assembly (Supplementary File 13). The RNA levels ranged between 3.2 and 5,242  
511 CPMs and the cluster length between 5,077 and 114,717 bp. piRNA clusters tend to  
512 overlap with REs, in keeping with their role in genome inactivation and transposon  
513 regulation (Krawetz et al., 2011; Pantano et al., 2015; Gòdia et al., 2018b). In our work,  
514 25% of the piRNA clusters co-localized with REs, most of which were SINEs (Figure 2  
515 (B)). As piRNAs are tissue-specific and we queried a testes database (Rosenkranz,  
516 2016), we also carried a *de novo* prediction of piRNA clusters with proTRAC using the  
517 remaining unaligned reads (average of 1.1 M reads) (Supplementary File 1). We  
518 identified 17 novel potential clusters of average abundance and length of 11.3 - 585  
519 CPMs and 2,357 - 56,029 bp, respectively and as a whole, they covered 159.7 kb of the  
520 Sscrofa11.1 genome. Six of the novel clusters were present in the 10 samples and are  
521 thus considered of high confidence (Supplementary File 14).

522  
523 tRNAs were the second most abundant class in porcine sperm, and their abundance is  
524 related to metabolic processes (Sharma et al., 2016). We identified 315 putative tRNAs  
525 from which 63% varied among samples ( $cv > 75\%$ ) (Supplementary File 13). Although  
526 the role of tRNAs in germ cells and in offspring health is uncertain, independent studies  
527 have shown that tRNA levels can be altered in response to certain manipulation of the  
528 paternal diet (Sharma et al., 2016; Gòdia et al., 2018b).

### 529 **Seasonal differences in the boar sperm transcriptome**

531 A seasonal variation on semen quality and fertility has been observed in several animal  
532 species including the pig. During the warm summer months, as the scrotum is unable to  
533 thermo-regulate, spermatogenesis is negatively affected and the number of sperm cells  
534 and their motility tend to decrease alongside with an increase on morphological  
535 abnormalities (Zasiadczyk et al., 2015; Rodriguez et al., 2017). This effect on semen  
536 quality and also fertility (Suriyasomboon et al., 2006) has been related to heat stress.  
537 The molecular mechanisms underlying this phenomenon remain unclear although links  
538 to oxidative stress and the production of reactive oxidative species (ROS), with the  
539 consequent damage on sperm membrane integrity, DNA damage, apoptosis, autophagy  
540 and reduction of mitochondrial activity have been proposed (Durairajanayagam et al.,  
541 2015; Argenti et al., 2018). In a recent study, Argenti and co-authors (Argenti et al.,  
542 2018) identified increased superoxide dismutase anti-oxidant activity in the sperm of  
543 boars raised in sub-tropical Brazil in the summer months probably as a molecular  
544 attempt to reduce the presence of ROS and sperm damage (Argenti et al., 2018).  
545 Moreover, dietary strategies based on supplementary Zinc (Li et al., 2017) and l-  
546 arginine (Chen et al., 2018) have been related to a reduction of oxidative stress and  
547 improvement on the epididymal function and boar sperm quality in summer.

548

549 We compared the transcriptome (mRNA transcripts and miRNA) of the sperm samples  
550 collected in the summer months (May to August; N = 5) with those collected in winter  
551 (October to February; N = 5) in a temperate climate zone (latitude 42° N). The semen  
552 quality of the summer and winter groups was not significantly different although a trend  
553 was seen for sperm cell viability (p-val = 0.05), acrosome reaction (p-val = 0.09) and  
554 neck (p-val = 0.07) and tail (p-val = 0.08) morphological abnormalities. We detected 36  
555 transcripts displaying a significant difference in abundance. Of these, two transcripts  
556 corresponded to the same gene and they were not taken into account due to concerns on  
557 the transcript allocation carried by the software. From, the 34 remaining transcripts,  
558 each from a different gene, 14 were up-regulated and 20 were down-regulated in the  
559 summer group (Table 3).

560  
561 The largest difference in gene abundance between both seasonal groups (q-val =  $3.13 \times$   
562  $10^{-16}$ ) corresponded to the minichromosome maintenance 8 homologous recombination  
563 repair factor (*MCM8*) gene (Table 3) which is a helicase related to the initiation of  
564 eukaryotic genome replication and may be associated with the length of the  
565 reproductive lifespan and menopause. *MCM8* plays a role in gametogenesis due to its  
566 essential functions in DNA damage repair via homologous recombination of DNA  
567 double strand breaks (Lutzmann et al., 2012). Another gene, the RUN Domain  
568 Containing 3B (*RUNDC3B*) has unknown functions but it contains a RUN domain that  
569 interacts with *RAP2*, a GTPase that has been linked to heat stress in plants (Figueroa-  
570 Yañez et al., 2016) and is related to male meiosis in mammals (Manterola et al., 2016).  
571 In keeping with *RAP2*'s function, a study in bulls found that spermatogonia undergoing  
572 meiosis during spermatogenesis were susceptible to heat stress (Rahman et al., 2018).  
573 This suggests that in mammals, spermatogonia exposed to heat stress, up-regulate the  
574 expression of *RUNDC3B* as a protective mechanism to ensure correct spermatogenesis  
575 and the production of normal spermatozoa. StAR Related Lipid Transfer Domain  
576 Containing 9 (*STARD9*), which was up-regulated in the summer group, is a lipid  
577 binding gene that has been related to asthenospermia in humans (Mao et al., 2011).  
578 Moreover, the paralog *STARD6* has been linked to spermatogenesis and spermatozoa  
579 quality (Mao et al., 2011). This is in keeping with the fact that the spermatozoon is very  
580 sensitive to oxidative damage for several reasons including the high amount of the  
581 peroxidation-prone unsaturated fatty acids that are present in its plasma membrane  
582 (Aitken and De Iuliis, 2010). Another gene that was found up-regulated in the summer  
583 group is the Oxidative Stress Induced Growth Inhibitor 1 gene (*OSGIN1*). *OSGIN1*  
584 has been related to autophagy and oxidative stress and its encoded protein regulates both  
585 cell death and apoptosis in the airway epithelium (Sukkar and Harris, 2017). Its  
586 expression is induced by DNA damage, which is one of the key sperm parameters that  
587 increase in the warm summer months (Perez-Crespo et al., 2008). Since this gene has  
588 also been identified in the sperm lineage, it could respond with a similar anti-oxidative  
589 role to heat stress in sperm.

590  
591 The presence of RNA in ejaculated sperm in summer versus winter seasons has been  
592 previously interrogated using the microarray technology (Yang et al., 2010). In that  
593 study the authors identified 33 dysregulated transcripts, none of which was  
594 differentially abundant in our dataset. This lack of concordance between works could be  
595 due to both biological and technical reasons and is somewhat expected. First, the two  
596 studies interrogated different animal populations in different geographic locations. The  
597 study by Yang *et al.* (Yang et al., 2010) focused on Duroc boars breed in a sub-tropical  
598 region in Taiwan (25°N) whilst we screened Pietrain males from a sub-Mediterranean



599 temperate climatic zone in Catalonia with warm summers and mildly cold winters  
600 (köppen classification Cfb; latitude 42°N). Moreover, we used a RNA-seq approach  
601 targeting the whole transcriptome whilst Yang and co-authors [21] employed a custom  
602 microarray interrogating only 708 target genes and by large, ignored the vast catalogue  
603 of annotated genes.

604  
605 We also identified 5 miRNAs up- and 2 miRNAs down- regulated in summer (Table 4).  
606 This set included miR-34c, which was one of the most abundant miRNAs in our study,  
607 as well as in the sperm of other species, and was down-regulated in the summer  
608 samples. The RNA levels of miR-34c were also down-regulated in the sperm of men  
609 and mice exposed to severe early life stress events (Dickson et al., 2018), and in the  
610 testis of cynomolgus monkeys exposed to testicular hyperthermia (Sakurai et al., 2016),  
611 thus suggesting a link between the seasonality of semen quality and miR-34c. miR-  
612 1249, down-regulated in the summer group, was also found to be altered in the semen of  
613 bulls with moderate fertility (Fagerlind et al., 2015). Members of the miR-106 family  
614 were recently associated with oxidative stress in several tissues and cell types. For  
615 example, miR-106b targets the 12/15-Lipoxygenase enzymes, which are involved in the  
616 metabolism of fatty acids and oxidative stress in murine neurons (Wu et al., 2017). miR-  
617 106b has also been related to autophagy and cellular stress in intestinal epithelial  
618 HCT116 cells (Zhai et al., 2013). A study in cattle identified a single nucleotide  
619 polymorphisms in a miR-378 target site of the *INCENP* semen quality associated gene  
620 (Liu et al., 2016). In humans, miR-378 was found to also target the autophagy related  
621 protein 12 gene (*ATG12*) in cervical cancer (Tan et al., 2018). Finally, miR-221 was  
622 linked to autophagy in several tissues as well (Li et al., 2016; Qian et al., 2017) and was  
623 shown to regulate *SOD2*, which has key mitochondrial anti-oxidant functions in a  
624 murine model of ischemic skeletal muscle regeneration (Togliatto et al., 2013).

625  
626 Our data, together with previous reports in swine, indicates that there is a molecular  
627 basis related to the well-reported decrease of semen quality and fertility in swine  
628 (Suriyasomboon et al., 2006; Zasiadczyk et al., 2015). These results should therefore be  
629 confirmed using additional animals and ideally, in a matched study where the winter  
630 and summer ejaculates come from the same boars. Nevertheless, our results are in  
631 keeping with previous data suggesting oxidative stress and autophagy as the key causes  
632 of the loss of semen quality in the warm summer periods.

633

634

## 635 **Conclusions**

636 We have identified a rich and complex sperm transcriptome with known and novel  
637 coding RNAs, lncRNAs and sncRNAs that resembles the human, mouse and cattle  
638 counterparts. Their roles are mainly related to the regulation of spermatogenesis,  
639 fertility and early embryo development. These spermatozoal transcripts are fragmented,  
640 likely in a selective manner, consistently affecting some genes more than others across  
641 samples. This suggests that their fragmentation has a programmatic basis. Similarly, the  
642 variability of the transcript abundance between samples was transcript specific. This in-  
643 depth transcriptome profile can be used a reference to identify RNA markers for semen  
644 quality and male fertility in pigs and in other animal species.

645

646 Interestingly, the levels of some transcripts changed between the summer and the winter  
647 ejaculates, most likely responding to heat stress, which would in turn, cause oxidative  
648 stress, sperm membrane and DNA damage and autophagy. Our data supports previous



649 findings suggesting that feed supplementation can correct this seasonal effect and thus,  
650 opens the door to explore nutri-genomics research to improve semen quality and male  
651 fertility. The biological basis of these transcriptome changes needs to be further  
652 explored. In the recent years it has become evident that the ejaculate contains different  
653 sub-populations of sperm, each with specific roles upon ejaculation. Thus, the changes  
654 in transcript abundances that we identified could reflect either similar variations on the  
655 transcript's load in all spermatozoa cells or indicate alterations in the proportion of the  
656 sperm sub-populations each carrying their specific transcript profile. Discriminating  
657 both hypotheses could help defining the best strategies to mitigate this seasonal effect.  
658 Single-cell RNA-seq, a novel and powerful technology that still needs to be optimized  
659 in spermatozoa, could allow identifying the sperm sub-populations and their relevance  
660 for seasonality, semen quality and fertility. The trans-generational consequences in  
661 these transcript profiles are also worth the study. The altered RNA levels in sperm may  
662 perpetuate in the offspring's ejaculate and have transgenerational phenotypic  
663 consequences. This should be also explored. In conclusion, our results pave the way to  
664 carrying future research to understand the molecular basis of semen quality seasonality  
665 in pigs, humans and other affected species.

666

#### 667 **List of abbreviations**

668 CPM: Counts per Million

669 CV: Coefficient of Variation

670 FPKM: Fragment per Kilobase per Million mapped reads

671 LINE1: Long Interspersed Nuclear Element 1

672 lncRNAs: Long non-coding RNAs

673 miRNAs: micro RNAs

674 NGS: Next Generation Sequencing

675 piRNAs: Piwi-interacting RNAs

676 RE: Repeat Element

677 RPKM: Reads Per Kilobase per Million mapped reads

678 SINE: Short Interspersed Nuclear Element

679 sncRNAs: small non-coding RNAs

680 SRE: Sperm RNA Element

681 TIN: Transcript Integrity Number

682 tRNAs: Transfer RNAs

683

#### 684 **Declarations**

685

#### 686 **Ethics approval and consent to participate**

687 The ejaculates obtained from pigs were privately owned for non-research purposes. The  
688 owners provided consent for the use of these samples for research. Specialized  
689 professionals at the farm obtained all the ejaculates following standard routine  
690 monitoring procedures and relevant guidelines. No animal experiment has been  
691 performed in the scope of this research.

692

#### 693 **Availability of data and material**

694 The datasets generated and/or analysed during the current study are available in the  
695 Gene Expression Omnibus repository, [PERSISTENT WEB LINK TO DATASETS]

696

#### 697 **Competing interests**

698 The authors declare that they have no competing interests

699

## 700 **Funding**

701 This work was supported by the Spanish Ministry of Economy and Competitiveness  
702 (MINECO) under grant AGL2013-44978-R and grant AGL2017-86946-R and by the  
703 CERCA Programme/Generalitat de Catalunya. We thank the Agency for Management  
704 of University and Research Grants (AGAUR) of the Generalitat de Catalunya (Grant  
705 Number 2014 SGR 1528). We also acknowledge the support of the Spanish Ministry of  
706 Economy and Competitiveness for the Center of Excellence Severo Ochoa 2016–2019  
707 (Grant Number SEV-2015-0533) grant awarded to the Centre for Research in  
708 Agricultural Genomics (CRAG). MG acknowledges a PhD studentship from MINECO  
709 (Grant Number BES-2014-070560) and a Short-Stay fellowship from MINECO  
710 (EEBB-I-2017-12229) at S.A.K.'s laboratory. MS acknowledges a Rumble fellowship.  
711 Funds through Charlotte B. Failing Professorship to SAK are gratefully appreciated.  
712 ACI was recipient of a MINECO's Ramon y Cajal research fellow (Grant Number  
713 RYC-2011-07763).

714

## 715 **Authors' contributions**

716 MG, AS and ACI conceived and designed the experiment; SB collected the samples and  
717 JERG carried the phenotypic analysis; MG performed sperm purifications and RNA  
718 extractions; ACa carried the qPCRs and their analysis; MG made the bioinformatics and  
719 statistic analysis; ME developed the SRE pipeline and provided bioinformatics support.  
720 MG analyzed the data, with special input from SAK and ACI. MG and ACI wrote the  
721 manuscript; all authors discussed the data and read and approved the contents of the  
722 manuscript.

723

## 724 **References:**

- 725 Aitken, R.J., and De Iuliis, G.N. (2010). On the possible origins of DNA damage in  
726 human spermatozoa. *Mol. Hum. Reprod.* 16, 3-13. doi: 10.1093/molehr/gap059.
- 727 Argenti, L.E., Parmeggiani, B.S., Leipnitz, G., Weber, A., Pereira, G.R., and  
728 Bustamante-Filho, I.C. (2018). Effects of season on boar semen parameters and  
729 antioxidant enzymes in the south subtropical region in Brazil. *Andrologia*. doi:  
730 10.1111/and.12951.
- 731 Bao, W., Kojima, K.K., and Kohany, O. (2015). Repbase Update, a database of  
732 repetitive elements in eukaryotic genomes. *Mobile DNA*. 6, 11. doi:  
733 10.1186/s13100-015-0041-9 (accessed August 2017).
- 734 Barcelo, M., Mata, A., Bassas, L., and Larriba, S. (2018). Exosomal microRNAs in  
735 seminal plasma are markers of the origin of azoospermia and can predict the  
736 presence of sperm in testicular tissue. *Hum. Reprod.* 33, 1087-1098. doi:  
737 10.1093/humrep/dey072.
- 738 Beraldi, R., Pittoggi, C., Sciamanna, I., Mattei, E., and Spadafora, C. (2006). Expression  
739 of LINE-1 retroposons is essential for murine preimplantation development.  
740 *Mol. Reprod. Dev.* 73, 279-287. doi: 10.1002/mrd.20423.
- 741 Bindea, G., Mlecnik, B., Hackl, H., Charoentong, P., Tosolini, M., Kirilovsky, A., et al.  
742 (2009). ClueGO: a Cytoscape plug-in to decipher functionally grouped gene  
743 ontology and pathway annotation networks. *Bioinformatics*. 25, 1091-1093. doi:  
744 10.1093/bioinformatics/btp101.
- 745 Bolger, A.M., Lohse, M., and Usadel, B. (2014). Trimmomatic: a flexible trimmer for  
746 Illumina sequence data. *Bioinformatics*. 30, 2114-2120. doi:  
747 10.1093/bioinformatics/btu170.

- 748 Bruggmann, R., Jagannathan, V., and Braunschweig, M. (2013). In Search of  
749 Epigenetic Marks in Testes and Sperm Cells of Differentially Fed Boars. *PLoS*  
750 *One*. 8:e78691. doi: 10.1371/journal.pone.0078691.
- 751 Bzymek, M., and Lovett, S.T. (2001). Instability of repetitive DNA sequences: The role  
752 of replication in multiple mechanisms. *Proc. Natl. Acad. Sci. U.S.A.* 98, 8319-  
753 8325. doi: DOI 10.1073/pnas.111008398.
- 754 Capra, E., Turri, F., Lazzari, B., Cremonesi, P., Gliozzi, T.M., Fojadelli, I., et al. (2017).  
755 Small RNA sequencing of cryopreserved semen from single bull revealed  
756 altered miRNAs and piRNAs expression between High- and Low-motile sperm  
757 populations. *BMC Genomics*. 18, 14. doi: 10.1186/s12864-016-3394-7.
- 758 Chan, P.P., and Lowe, T.M. (2016). GtRNADB 2.0: an expanded database of transfer  
759 RNA genes identified in complete and draft genomes. *Nucleic Acids Res.* 44,  
760 D184-D189. doi: 10.1093/nar/gkv1309.
- 761 Chen, C., Wu, H., Shen, D., Wang, S.S., Zhang, L., Wang, X.Y., et al. (2017a).  
762 Comparative profiling of small RNAs of pig seminal plasma and ejaculated and  
763 epididymal sperm. *Reproduction*. 153, 785-796. doi: 10.1530/Rep-17-0014.
- 764 Chen, J.Q., Li, Y.S., Li, Z.J., Lu, H.X., Zhu, P.Q., and Li, C.M. (2018). Dietary l-  
765 arginine supplementation improves semen quality and libido of boars under high  
766 ambient temperature. *Animal*. 12, 1611-1620. doi:  
767 10.1017/S1751731117003147.
- 768 Chen, X.X., Che, D.X., Zhang, P.F., Li, X.L., Yuan, Q.Q., Liu, T.T., et al. (2017b).  
769 Profiling of miRNAs in porcine germ cells during spermatogenesis.  
770 *Reproduction*. 154, 789-798. doi: 10.1530/Rep-17-0441.
- 771 Das, P.J., McCarthy, F., Vishnoi, M., Paria, N., Gresham, C., Li, G., et al. (2013).  
772 Stallion Sperm Transcriptome Comprises Functionally Coherent Coding and  
773 Regulatory RNAs as Revealed by Microarray Analysis and RNA-seq. *PLoS*  
774 *One*. 8:e56535. doi: 10.1371/journal.pone.0056535.
- 775 Dickson, D.A., Paulus, J.K., Mensah, V., Lem, J., Saavedra-Rodriguez, L., Gentry, A.,  
776 et al. (2018). Reduced levels of miRNAs 449 and 34 in sperm of mice and men  
777 exposed to early life stress. *Transl. Psychiatry*. 8, 101. doi: 10.1038/s41398-018-  
778 0146-2.
- 779 Durairajanayagam, D., Agarwal, A., and Ong, C. (2015). Causes, effects and molecular  
780 mechanisms of testicular heat stress. *Reprod. Biomed. Online*. 30, 14-27. doi:  
781 10.1016/j.rbmo.2014.09.018.
- 782 Durinck, S., Spellman, P.T., Birney, E., and Huber, W. (2009). Mapping identifiers for  
783 the integration of genomic datasets with the R/Bioconductor package biomaRt.  
784 *Nat. Protoc.* 4, 1184-1191. doi: 10.1038/nprot.2009.97.
- 785 Fagerlind, M., Stalhammar, H., Olsson, B., and Klinga-Levan, K. (2015). Expression of  
786 miRNAs in Bull Spermatozoa Correlates with Fertility Rates. *Reprod. Domest.*  
787 *Anim.* 50, 587-594. doi: 10.1111/rda.12531.
- 788 Figueroa-Yañez, L., Pereira-Santana, A., Arroyo-Herrera, A., Rodriguez-Corona, U.,  
789 Sanchez-Teyer, F., Espadas-Alcocer, J., et al. (2016). RAP2.4a Is Transported  
790 through the Phloem to Regulate Cold and Heat Tolerance in Papaya Tree (*Carica*  
791 *papaya* cv. Maradol): Implications for Protection Against Abiotic Stress. *PLoS*  
792 *One*. 11:e0165030. doi: 10.1371/journal.pone.0165030.
- 793 Gòdia, M., Mayer, F.Q., Nafissi, J., Castelló, A., Rodríguez-Gil, J.E., Sánchez, A., et al.  
794 (2018a). A technical assessment of the porcine ejaculated spermatozoa for a  
795 sperm-specific RNA-seq analysis. *Syst. Biol. Reprod. Med.* 64, 291-303. doi:  
796 10.1080/19396368.2018.1464610.

- 797 Gòdia, M., Swanson, G., and Krawetz, S.A. (2018b). A History of Why Fathers' RNA  
798 Matters. *Biol. Reprod.* 99, 147-159.
- 799 Grabherr, M.G., Haas, B.J., Yassour, M., Levin, J.Z., Thompson, D.A., Amit, I., et al.  
800 (2011). Full-length transcriptome assembly from RNA-Seq data without a  
801 reference genome. *Nat. Biotechnol.* 29, 644-652. doi: 10.1038/nbt.1883.
- 802 Jodar, M., Sendler, E., and Krawetz, S.A. (2016). The protein and transcript profiles of  
803 human semen. *Cell Tissue Res.* 363, 85-96. doi: 10.1007/s00441-015-2237-1.
- 804 Jodar, M., Sendler, E., Moskovtsev, S.I., Librach, C.L., Goodrich, R., Swanson, S., et  
805 al. (2015). Absence of sperm RNA elements correlates with idiopathic male  
806 infertility. *Sci. Transl. Med.* 7, 295re296. doi: 10.1126/scitranslmed.aab1287.
- 807 Johnson, G.D., Mackie, P., Jodar, M., Moskovtsev, S., and Krawetz, S.A. (2015).  
808 Chromatin and extracellular vesicle associated sperm RNAs. *Nucleic Acids Res.*  
809 43, 6847-6859. doi: 10.1093/nar/gkv591.
- 810 Kim, D., Langmead, B., and Salzberg, S.L. (2015). HISAT: a fast spliced aligner with  
811 low memory requirements. *Nat. Methods.* 12, 357-360. doi:  
812 10.1038/nmeth.3317.
- 813 Kozomara, A., and Griffiths-Jones, S. (2011). miRBase: integrating microRNA  
814 annotation and deep-sequencing data. *Nucleic Acids Res.* 39, D152-D157. doi:  
815 10.1093/nar/gkq1027.
- 816 Krawetz, S.A., Kruger, A., Lalancette, C., Tagett, R., Anton, E., Draghici, S., et al.  
817 (2011). A survey of small RNAs in human sperm. *Hum. Reprod.* 26, 3401-3412.  
818 doi: 10.1093/humrep/der329.
- 819 Kuhn, R.M., Haussler, D., and Kent, W.J. (2013). The UCSC genome browser and  
820 associated tools. *Brief. Bioinformatics.* 14, 144-161. doi: 10.1093/bib/bbs038.
- 821 Li, L., Wang, Z., Hu, X., Wan, T., Wu, H., Jiang, W., et al. (2016). Human aortic  
822 smooth muscle cell-derived exosomal miR-221/222 inhibits autophagy via a  
823 PTEN/Akt signaling pathway in human umbilical vein endothelial cells.  
824 *Biochem. Biophys. Res. Commun.* 479, 343-350. doi:  
825 10.1016/j.bbrc.2016.09.078.
- 826 Li, Z., Li, Y., Zhou, X., Cao, Y., and Li, C. (2017). Preventive effects of supplemental  
827 dietary zinc on heat-induced damage in the epididymis of boars. *J. Therm. Biol.*  
828 64, 58-66. doi: 10.1016/j.jtherbio.2017.01.002.
- 829 Liu, J., Sun, Y., Yang, C., Zhang, Y., Jiang, Q., Huang, J., et al. (2016). Functional  
830 SNPs of INCENP Affect Semen Quality by Alternative Splicing Mode and  
831 Binding Affinity with the Target Bta-miR-378 in Chinese Holstein Bulls. *PLoS*  
832 *One.* 11, e0162730. doi: 10.1371/journal.pone.0162730.
- 833 Love, M.I., Huber, W., and Anders, S. (2014). Moderated estimation of fold change and  
834 dispersion for RNA-seq data with DESeq2. *Genome Biol.* 15, 550. doi:  
835 10.1186/s13059-014-0550-8.
- 836 Luo, Z.G., Liu, Y.K., Chen, L., Ellis, M., Li, M.Z., Wang, J.Y., et al. (2015). microRNA  
837 profiling in three main stages during porcine spermatogenesis. *J. Assist. Reprod.*  
838 *Genet.* 32, 451-460. doi: 10.1007/s10815-014-0406-x.
- 839 Lutzmann, M., Grey, C., Traver, S., Ganier, O., Maya-Mendoza, A., Ranisavljevic, N.,  
840 et al. (2012). MCM8- and MCM9-deficient mice reveal gametogenesis defects  
841 and genome instability due to impaired homologous recombination. *Mol Cell* 47,  
842 523-534. doi: 10.1016/j.molcel.2012.05.048.
- 843 Ma, X., Zhu, Y., Li, C., Xue, P., Zhao, Y., Chen, S., et al. (2014). Characterisation of  
844 *Caenorhabditis elegans* sperm transcriptome and proteome. *BMC Genomics.* 15,  
845 168. doi: 10.1186/1471-2164-15-168.



- 846 Manterola, M., Sicinski, P., and Wolgemuth, D.J. (2016). E-type cyclins modulate  
847 telomere integrity in mammalian male meiosis. *Chromosoma*. 125, 253-264. doi:  
848 10.1007/s00412-015-0564-3.
- 849 Mao, X.M., Xing, R.W., Jing, X.W., Zhou, Q.Z., Yu, Q.F., Guo, W.B., et al. (2011).  
850 [Differentially expressed genes in asthenospermia: a bioinformatics-based  
851 study]. *Zhonghua Nan Ke Xue*. 17, 694-698.
- 852 Marques, D.B.D., Lopes, M.S., Broekhuijse, M., Guimaraes, S.E.F., Knol, E.F.,  
853 Bastiaansen, J.W.M., et al. (2017). Genetic parameters for semen quality and  
854 quantity traits in five pig lines. *J. Anim. Sci.* 95, 4251-4259. doi:  
855 10.2527/jas2017.1683.
- 856 Martin, M. (2011). Cutadapt removes adapter sequences from high-throughput  
857 sequencing reads. *EMBnet.journal*. 17, 10-12. doi: 10.14806/ej.17.1.200
- 858 Netherton, J.K., Hetherington, L., Ogle, R.A., Velkov, T., and Baker, M.A. (2018).  
859 Proteomic analysis of good- and poor-quality human sperm demonstrates that  
860 several proteins are routinely aberrantly regulated. *Biol. Reprod.* 99, 395-408.  
861 doi: 10.1093/biolre/iox166.
- 862 OECD (2018). *Meat consumption (indicator)* [Online]. Available: [https://www.oecd-](https://www.oecd-ilibrary.org/content/data/fa290fd0-en)  
863 [ilibrary.org/content/data/fa290fd0-en](https://www.oecd-ilibrary.org/content/data/fa290fd0-en) [Accessed 15 July 2018].
- 864 Pantano, L., Jodar, M., Bak, M., Balleca, J.L., Tommerup, N., Oliva, R., et al. (2015).  
865 The small RNA content of human sperm reveals pseudogene-derived piRNAs  
866 complementary to protein-coding genes. *RNA*. 21, 1085-1095. doi:  
867 10.1261/rna.046482.114.
- 868 Perez-Crespo, M., Pintado, B., and Gutierrez-Adan, A. (2008). Scrotal heat stress  
869 effects on sperm viability, sperm DNA integrity, and the offspring sex ratio in  
870 mice. *Mol. Reprod. Dev.* 75, 40-47. doi: 10.1002/mrd.20759.
- 871 Perteau, M., Perteau, G.M., Antonescu, C.M., Chang, T.C., Mendell, J.T., and Salzberg,  
872 S.L. (2015). StringTie enables improved reconstruction of a transcriptome from  
873 RNA-seq reads. *Nat. Biotechnol.* 33, 290-295. doi: 10.1038/nbt.3122.
- 874 Perteau, M., Shumate, A., Perteau, G., Varabyou, A., Chang, Y.-C., Madugundu, A.K., et  
875 al. (2018). Thousands of large-scale RNA sequencing experiments yield a  
876 comprehensive new human gene list and reveal extensive transcriptional noise.  
877 *bioRxiv*. doi: 10.1101/332825.
- 878 Qian, L.B., Jiang, S.Z., Tang, X.Q., Zhang, J., Liang, Y.Q., Yu, H.T., et al. (2017).  
879 Exacerbation of diabetic cardiac hypertrophy in OVE26 mice by angiotensin II  
880 is associated with JNK/c-Jun/miR-221-mediated autophagy inhibition.  
881 *Oncotarget*. 8, 106661-106671. doi: 10.18632/oncotarget.21302.
- 882 Quinlan, A.R., and Hall, I.M. (2010). BEDTools: a flexible suite of utilities for  
883 comparing genomic features. *Bioinformatics*. 26, 841-842. doi:  
884 10.1093/bioinformatics/btq033.
- 885 Rahman, M.B., Schellander, K., Luceno, N.L., and Van Soom, A. (2018). Heat stress  
886 responses in spermatozoa: Mechanisms and consequences for cattle fertility.  
887 *Theriogenology*. 113, 102-112. doi: 10.1016/j.theriogenology.2018.02.012.
- 888 Rodriguez-Gil, J.E., and Bonet, S. (2016). Current knowledge on boar sperm  
889 metabolism: Comparison with other mammalian species. *Theriogenology*. 85, 4-  
890 11. doi: 10.1016/j.theriogenology.2015.05.005.
- 891 Rodriguez, A.L., Van Soom, A., Arsenakis, I., and Maes, D. (2017). Boar management  
892 and semen handling factors affect the quality of boar extended semen. *Porcine*  
893 *Health Manag.* doi: 10.1186/s40813-017-0062-5.
- 894 Rosenkranz, D. (2016). piRNA cluster database: a web resource for piRNA producing  
895 loci. *Nucleic Acids Res.* 44, D223-D230. doi: 10.1093/nar/gkv1265.



- 896 Rosenkranz, D., and Zischler, H. (2012). proTRAC--a software for probabilistic piRNA  
897 cluster detection, visualization and analysis. *BMC Bioinformatics*. 13, 5. doi:  
898 10.1186/1471-2105-13-5.
- 899 Rueda, A., Barturen, G., Lebron, R., Gomez-Martin, C., Alganza, A., Oliver, J.L., et al.  
900 (2015). sRNAtoolbox: an integrated collection of small RNA research tools.  
901 *Nucleic Acids Res.* 43, W467-W473. doi: 10.1093/nar/gkv555.
- 902 Sakurai, K., Mikamoto, K., Shirai, M., Iguchi, T., Ito, K., Takasaki, W., et al. (2016).  
903 MicroRNA profiles in a monkey testicular injury model induced by testicular  
904 hyperthermia. *J. Appl. Toxicol.* 36, 1614-1621. doi: 10.1002/jat.3326.
- 905 Salas-Huetos, A., Blanco, J., Vidal, F., Godo, A., Grossmann, M., Pons, M.C., et al.  
906 (2015). Spermatozoa from patients with seminal alterations exhibit a differential  
907 micro-ribonucleic acid profile. *Fertil. Steril.* 104, 591-601. doi:  
908 10.1016/j.fertnstert.2015.06.015.
- 909 Schmid, C., Heng, H.H.Q., Rubin, C., Ye, C.J., and Krawetz, S.A. (2001). Sperm  
910 nuclear matrix association of the PRM1 -> PRM2 -> TNP2 domain is  
911 independent of Alu methylation. *Mol. Hum. Reprod.* 7, 903-911. doi:  
912 10.1093/molehr/7.10.903.
- 913 Selvaraju, S., Parthipan, S., Somashekar, L., Kolte, A.P., Krishnan Binsila, B.,  
914 Arangasamy, A., et al. (2017). Occurrence and functional significance of the  
915 transcriptome in bovine (*Bos taurus*) spermatozoa. *Sci. Rep.* 7, 42392. doi:  
916 10.1038/srep42392.
- 917 Sandler, E., Johnson, G.D., Mao, S., Goodrich, R.J., Diamond, M.P., Hauser, R., et al.  
918 (2013). Stability, delivery and functions of human sperm RNAs at fertilization.  
919 *Nucleic Acids Res.* 41, 4104-4117. doi: 10.1093/nar/gkt132.
- 920 Sharma, U., Conine, C.C., Shea, J.M., Boskovic, A., Derr, A.G., Bing, X.Y., et al.  
921 (2016). Biogenesis and function of tRNA fragments during sperm maturation  
922 and fertilization in mammals. *Science*. 351, 391-396. doi:  
923 10.1126/science.aad6780.
- 924 Sukkar, M.B., and Harris, J. (2017). Potential impact of oxidative stress induced growth  
925 inhibitor 1 (OSGIN1) on airway epithelial cell autophagy in chronic obstructive  
926 pulmonary disease (COPD). *J. Thorac. Dis.* 9, 4825-4827. doi:  
927 10.21037/jtd.2017.10.153.
- 928 Suriyasomboon, A., Lundeheim, N., Kunavongkrit, A., and Einarsson, S. (2006). Effect  
929 of temperature and humidity on reproductive performance of crossbred sows in  
930 Thailand. *Theriogenology*. 65, 606-628. doi:  
931 10.1016/j.theriogenology.2005.06.005.
- 932 Tan, D., Zhou, C., Han, S., Hou, X., Kang, S., and Zhang, Y. (2018). MicroRNA-378  
933 enhances migration and invasion in cervical cancer by directly targeting  
934 autophagy-related protein 12. *Mol. Med. Report.* 17, 6319-6326. doi:  
935 10.3892/mmr.2018.8645.
- 936 Tian, H., Li, Z.L., Peng, D., Bai, X.G., and Liang, W.B. (2017). Expression difference  
937 of miR-10b and miR-135b between the fertile and infertile semen samples (p).  
938 *Forensic Sci. Int. Genet. Suppl. Ser.* 6, E257-E259. doi:  
939 10.1016/j.fsigss.2017.09.092.
- 940 Togliatto, G., Trombetta, A., Dentelli, P., Cotogni, P., Rosso, A., Tschop, M.H., et al.  
941 (2013). Unacylated ghrelin promotes skeletal muscle regeneration following  
942 hindlimb ischemia via SOD-2-mediated miR-221/222 expression. *J. Am. Heart.*  
943 *Assoc.* 2, e000376. doi: 10.1161/JAHA.113.000376.

- 944 Trudeau, V., and Sanford, L.M. (1986). Effect of season and social environment on  
945 testis size and semen quality of the adult Landrace boar. *J. Anim. Sci.* 63, 1211-  
946 1219.
- 947 Vojtech, L., Woo, S., Hughes, S., Levy, C., Ballweber, L., Sauteraud, R.P., et al. (2014).  
948 Exosomes in human semen carry a distinctive repertoire of small non-coding  
949 RNAs with potential regulatory functions. *Nucleic Acids Res.* 42, 7290-7304.  
950 doi: 10.1093/nar/gku347.
- 951 Wang, L., Wang, S., and Li, W. (2012). RSeQC: quality control of RNA-seq  
952 experiments. *Bioinformatics.* 28, 2184-2185. doi:  
953 10.1093/bioinformatics/bts356.
- 954 Waterston, R.H., Lindblad-Toh, K., Birney, E., Rogers, J., Abril, J.F., Agarwal, P., et al.  
955 (2002). Initial sequencing and comparative analysis of the mouse genome.  
956 *Nature.* 420, 520-562. doi: 10.1038/nature01262.
- 957 Wettemann, R.P., Wells, M.E., Omtvedt, I.T., Pope, C.E., and Turman, E.J. (1976).  
958 Influence of elevated ambient temperature on reproductive performance of  
959 boars. *J. Anim. Sci.* 42, 664-669.
- 960 Wood, D.E., and Salzberg, S.L. (2014). Kraken: ultrafast metagenomic sequence  
961 classification using exact alignments. *Genome Biol.* 15, R46. doi: 10.1186/gb-  
962 2014-15-3-r46.
- 963 Wu, Y., Xu, D., Zhu, X., Yang, G., and Ren, M. (2017). MiR-106a Associated with  
964 Diabetic Peripheral Neuropathy Through the Regulation of 12/15-LOX-  
965 mediated Oxidative/Nitrative Stress. *Curr. Neurovasc. Res.* 14, 117-124. doi:  
966 10.2174/1567202614666170404115912.
- 967 Yang, C.C., Lin, Y.S., Hsu, C.C., Tsai, M.H., Wu, S.C., and Cheng, W.T. (2010).  
968 Seasonal effect on sperm messenger RNA profile of domestic swine (*Sus*  
969 *Scrofa*). *Anim. Reprod. Sci.* 119, 76-84. doi: 10.1016/j.anireprosci.2009.12.002.
- 970 Yang, C.C., Lin, Y.S., Hsu, C.C., Wu, S.C., Lin, E.C., and Cheng, W.T.K. (2009).  
971 Identification and sequencing of remnant messenger RNAs found in domestic  
972 swine (*Sus scrofa*) fresh ejaculated spermatozoa. *Anim. Reprod. Sci.* 113, 143-  
973 155. doi: 10.1016/j.anireprosci.2008.08.012.
- 974 Yu, J., Wu, H., Wen, Y., Liu, Y.J., Zhou, T., Ni, B.X., et al. (2015). Identification of  
975 seven genes essential for male fertility through a genome-wide association study  
976 of non-obstructive azoospermia and RNA interference-mediated large-scale  
977 functional screening in *Drosophila*. *Hum. Mol. Genet.* 24, 1493-1503. doi:  
978 10.1093/hmg/ddu557.
- 979 Yuan, S., Tang, C., Zhang, Y., Wu, J., Bao, J., Zheng, H., et al. (2015). mir-34b/c and  
980 mir-449a/b/c are required for spermatogenesis, but not for the first cleavage  
981 division in mice. *Biol. Open.* 4, 212-223. doi: 10.1242/bio.201410959.
- 982 Zasiadczyk, L., Fraser, L., Kordan, W., and Wasilewska, K. (2015). Individual and  
983 seasonal variations in the quality of fractionated boar ejaculates.  
984 *Theriogenology.* 83, 1287-1303. doi: 10.1016/j.theriogenology.2015.01.015.
- 985 Zhai, Z., Wu, F., Chuang, A.Y., and Kwon, J.H. (2013). miR-106b fine tunes ATG16L1  
986 expression and autophagic activity in intestinal epithelial HCT116 cells.  
987 *Inflamm. Bowel Dis.* 19, 2295-2301. doi: 10.1097/MIB.0b013e31829e71cf.
- 988 Zhang, X., Gao, F., Fu, J., Zhang, P., Wang, Y., and Zeng, X. (2017). Systematic  
989 identification and characterization of long non-coding RNAs in mouse mature  
990 sperm. *PLoS One.* 12, e0173402. doi: 10.1371/journal.pone.0173402.
- 991  
992  
993

994 **Legends to Figures**

995 **Figure 1.** Cumulative abundance of the porcine SREs.

996 The black dots indicate the log<sub>10</sub> of the RNA abundance of each SRE. SREs are sorted  
997 in a decreasing order by their RNA abundance in the X axis. The red line represents the  
998 total number of SREs for each abundance decile group. The first decile of the most  
999 abundant SREs accounted for 65% of the total read abundance. RPKM: Reads Per  
1000 Kilobase per Million mapped reads; SRE: Sperm RNA Element.

1001

1002 **Figure 2.** Read mapping distribution of the short non-coding RNA types and piRNA  
1003 distribution within the Repetitive Element classes.

1004 **(A).** Proportion of reads mapping to each short non-coding RNA type. **(B).** Distribution  
1005 within each Repetitive Element class of the piRNA cluster reads overlapping with  
1006 Repetitive Elements.

1007 **Table 1.** List of the 30 most abundant SREs in the porcine sperm. The most abundant  
1008 SREs from protein coding genes included 12 mitochondrial and 15 nuclear genes. Some  
1009 genes (e.g. *PRMI*, *OAZ3*, *ANKRD35*) presented more than one highly abundant SRE.  
1010 SD: Standard Deviation; SRE: Sperm RNA Element. The SRE genomic coordinates are  
1011 displayed in the format chromosome:start location–end location. Mean abundance and  
1012 abundance SD are indicated in RPKM: Reads Per Kilobase per Million mapped reads.

| <b>Ensembl ID</b>  | <b>Gene ID</b>   | <b>SRE genomic coordinates</b> | <b>SRE Type</b> | <b>Mean abundance</b> | <b>Abundance SD</b> |
|--------------------|------------------|--------------------------------|-----------------|-----------------------|---------------------|
| ENSSSCG00000018075 | <i>COX1</i>      | MT:6511-8055                   | EXON            | 42244                 | 14055               |
| ENSSSCG00000018078 | <i>COX2</i>      | MT:8203-8890                   | EXON            | 25411                 | 11931               |
| ENSSSCG00000018080 | <i>ATP8,</i>     |                                |                 |                       |                     |
| ENSSSCG00000018081 | <i>ATP6,</i>     | MT:8959-10583                  | EXON            | 18282                 | 10076               |
| ENSSSCG00000018082 | <i>COX3</i>      |                                |                 |                       |                     |
| ENSSSCG00000021337 | <i>PRM1</i>      | 3:31861071-31861233            | EXON            | 14509                 | 2711                |
| ENSSSCG00000018094 | <i>CYTB</i>      | MT:15342-16481                 | EXON            | 13414                 | 6153                |
| ENSSSCG00000018091 | <i>ND5</i>       | MT:12935-14755                 | EXON            | 12285                 | 7527                |
| ENSSSCG00000027091 | <i>OAZ3</i>      | 4:97442381-97442556            | EXON            | 10492                 | 2592                |
| ENSSSCG00000027091 | <i>OAZ3</i>      | 4:97441308-97441393            | EXON            | 10441                 | 3563                |
| ENSSSCG00000018092 | <i>ND6</i>       | MT:14739-15266                 | EXON            | 8983                  | 5521                |
| ENSSSCG00000016203 | <i>CFAP65</i>    | 15:121057113-121057202         | NOVEL_INTRONIC  | 8302                  | 7705                |
| ENSSSCG00000018086 | <i>ND4, LND4</i> | MT:11069-12736                 | EXON            | 7984                  | 4396                |
| ENSSSCG00000018087 |                  |                                |                 |                       |                     |
| ENSSSCG00000006302 | <i>GPR161</i>    | 4:82900699-82900818            | EXON            | 7256                  | 1350                |
| ENSSSCG00000018069 | <i>ND2</i>       | MT:5087-6128                   | EXON            | 7038                  | 4966                |
| ENSSSCG00000027091 | <i>OAZ3</i>      | 4:97443314-97443450            | EXON            | 6469                  | 1151                |
| ENSSSCG00000006688 | <i>ANKRD35</i>   | 4:99454337-99454374            | EXON            | 6130                  | 1564                |
| ENSSSCG00000028031 | <i>HDAC11</i>    | 13:70866593-70866635           | EXON            | 6012                  | 820                 |
| ENSSSCG00000005585 | <i>DENND1A</i>   | 1:264683712-264683755          | EXON            | 5849                  | 1643                |
| ENSSSCG00000006302 | <i>GPR161</i>    | 4:82896938-82897042            | EXON            | 5714                  | 839                 |
| ENSSSCG00000017609 | <i>ANKFN1</i>    | 12:32508908-32509087           | NOVEL_INTRONIC  | 5539                  | 3823                |
| ENSSSCG00000006688 | <i>ANKRD35</i>   | 4:99459430-99459495            | EXON            | 5483                  | 1332                |
| ENSSSCG00000007010 | <i>ZMAT4</i>     | 17:9836268-9836357             | NOVEL_INTRONIC  | 5411                  | 4921                |
| ENSSSCG00000017770 | <i>PROCA1</i>    | 12:44943383-44943515           | EXON            | 5242                  | 1245                |
| ENSSSCG00000017413 | <i>HSPB9</i>     | 12:20636767-20637249           | EXON            | 5235                  | 1007                |

|                    |                 |                        |                |      |      |
|--------------------|-----------------|------------------------|----------------|------|------|
| ENSSSCG00000000018 | <i>KIAA0930</i> | 5:4184013-4184090      | EXON           | 5176 | 1151 |
| ENSSSCG00000018065 | <i>NDI</i>      | MT:3922-4876           | EXON           | 5155 | 3419 |
| ENSSSCG00000021337 | <i>PRMI</i>     | 3:31861339-31861529    | EXON           | 5137 | 988  |
| ENSSSCG00000016893 | <i>NDUFS4</i>   | 16:32891178-32891257   | NOVEL_INTRONIC | 4843 | 2985 |
| ENSSSCG00000023974 | <i>PHF21A</i>   | 2:16386945-16386977    | EXON           | 4792 | 1481 |
| ENSSSCG00000006688 | <i>ANKRD35</i>  | 4:99450478-99450566    | EXON           | 4760 | 753  |
| ENSSSCG00000035537 | <i>RUNXI</i>    | 13:198392909-198392938 | NOVEL_INTRONIC | 4759 | 5935 |

---

1013

1014

1015

1016

1017

1018

1019

1020



1021 **Table 2.** List of the 10% most abundant intact transcripts (TIN > 75) in the boar sperm.  
1022 Transcript integrity was measured as TIN: Transcript Integrity Number; TIN mean:  
1023 Average TIN. SD: Standard Deviation. \* Gene symbol extracted from an orthologous  
1024 gene species.

| <b>Ensembl Transcript ID</b> | <b>Gene ID</b>  | <b>TIN mean</b> | <b>TIN SD</b> |
|------------------------------|-----------------|-----------------|---------------|
| ENSSSCT00000018955           | <i>ZNRF4</i>    | 97.60           | 0.56          |
| ENSSSCT00000007842           | <i>TMEM239</i>  | 93.54           | 2.54          |
| ENSSSCT00000019381           | <i>HSPB9</i>    | 92.62           | 3.48          |
| ENSSSCT00000046661           | <i>UBLAB</i>    | 91.93           | 2.24          |
| ENSSSCT00000001702           | <i>C6orf106</i> | 89.91           | 4.00          |
| ENSSSCT00000006503           | <i>SPATC1</i>   | 86.40           | 2.61          |
| ENSSSCT00000030220           | <i>OAZ3</i>     | 84.91           | 2.74          |
| ENSSSCT00000004015           | <i>AZIN2</i>    | 83.92           | 3.15          |
| ENSSSCT00000049885           | <i>PRM3</i>     | 83.56           | 2.27          |
| ENSSSCT00000029296           | <i>DBIL5*</i>   | 83.21           | 3.71          |
| ENSSSCT00000014766           | <i>ZNRF4</i>    | 82.36           | 2.23          |
| ENSSSCT00000048242           | <i>ACSBG2*</i>  | 81.15           | 2.62          |
| ENSSSCT00000007224           | <i>SMCP</i>     | 79.47           | 5.33          |
| ENSSSCT00000003898           | <i>KIF17</i>    | 79.04           | 1.67          |
| ENSSSCT00000007327           | <i>ANKRD35</i>  | 78.97           | 2.91          |
| ENSSSCT00000012714           | <i>DNAJB8</i>   | 76.43           | 4.11          |
| ENSSSCT00000000746           | <i>TPI1</i>     | 75.99           | 3.63          |
| ENSSSCT00000029974           | <i>PRM1</i>     | 75.72           | 1.44          |

1025

1026

1027

1028

1029

1030

1031

1032

1033

1034

1035

1036

1037 **Table 3.** Messenger RNA transcripts showing differential abundances in the summer  
 1038 versus the winter ejaculates. The list includes only these transcripts with q-val < 0.05  
 1039 and log<sub>2</sub> (FC) < -1.5 or >1.5. log<sub>2</sub> (FC) > 0 indicate up-regulation in summer when  
 1040 compared to winter. Empty cells in the Gene ID column correspond to transcripts  
 1041 without gene symbol or description. FC: Fold-Change; FDR: False Discovery Rate.  
 1042

| Transcript ID      | Gene ID        | Log <sub>2</sub> (FC) | p-value  | q-value (FDR) |
|--------------------|----------------|-----------------------|----------|---------------|
| ENSSSCT00000058763 | <i>NSUN6</i>   | -9.62                 | 7.00E-16 | 4.35E-12      |
| ENSSSCT00000056639 | <i>ATG16L1</i> | -7.75                 | 1.03E-08 | 2.14E-05      |
| ENSSSCT00000059752 | <i>EHBP1</i>   | -7.49                 | 7.95E-08 | 1.35E-04      |
| ENSSSCT00000059921 | <i>CENPC</i>   | -6.55                 | 8.56E-07 | 1.06E-03      |
| ENSSSCT00000012060 | <i>MTPAP</i>   | -6.51                 | 3.16E-07 | 4.21E-04      |
| ENSSSCT00000056608 | <i>SMARCA2</i> | -6.48                 | 1.66E-05 | 1.15E-02      |
| ENSSSCT00000066205 | <i>CNOT3</i>   | -6.22                 | 1.75E-06 | 1.72E-03      |
| ENSSSCT00000014560 | <i>KIF18A</i>  | -6.01                 | 6.79E-05 | 3.62E-02      |
| ENSSSCT00000057538 | <i>ZNF24</i>   | -5.88                 | 4.01E-05 | 2.34E-02      |
| ENSSSCT00000018135 | <i>AOAH</i>    | -5.47                 | 2.54E-05 | 1.58E-02      |
| ENSSSCT00000015909 | <i>PSMD13</i>  | -3.76                 | 1.60E-05 | 1.15E-02      |
| ENSSSCT00000037719 | <i>STARD9</i>  | -2.63                 | 2.18E-05 | 1.45E-02      |
| ENSSSCT00000039055 | <i>CPEB3</i>   | -2.32                 | 4.98E-05 | 2.81E-02      |
| ENSSSCT00000039293 | <i>MED13L</i>  | -2.13                 | 1.62E-05 | 1.15E-02      |
| ENSSSCT00000043522 | <i>OSGIN1</i>  | -1.75                 | 9.49E-06 | 7.69E-03      |
| ENSSSCT00000012151 | <i>CUL2</i>    | 1.66                  | 5.66E-05 | 3.10E-02      |
| ENSSSCT00000001457 |                | 4.44                  | 6.31E-14 | 2.94E-10      |
| ENSSSCT00000049515 | <i>ZMYND10</i> | 4.72                  | 1.26E-06 | 1.31E-03      |
| ENSSSCT00000011652 | <i>TRUB1</i>   | 4.93                  | 2.33E-05 | 1.50E-02      |
| ENSSSCT00000049377 | <i>NUP58</i>   | 5.14                  | 9.56E-05 | 4.95E-02      |
| ENSSSCT00000007716 | <i>MCM8</i>    | 5.15                  | 1.68E-20 | 3.13E-16      |
| ENSSSCT00000035098 | <i>ERBIN</i>   | 5.31                  | 9.92E-06 | 7.71E-03      |
| ENSSSCT00000031111 | <i>ANKRD6</i>  | 5.53                  | 2.58E-06 | 2.40E-03      |
| ENSSSCT00000038311 | <i>MCPHI</i>   | 5.65                  | 4.31E-06 | 3.83E-03      |
| ENSSSCT00000018344 | <i>WDR70</i>   | 5.72                  | 1.04E-06 | 1.18E-03      |
| ENSSSCT00000037667 | <i>ASCC1</i>   | 5.78                  | 2.80E-05 | 1.69E-02      |
| ENSSSCT00000002542 | <i>FUT8</i>    | 6.00                  | 5.14E-06 | 4.36E-03      |
| ENSSSCT00000032033 | <i>TMEM230</i> | 6.01                  | 2.08E-07 | 2.98E-04      |
| ENSSSCT00000050364 | <i>PDE3B</i>   | 6.45                  | 1.62E-07 | 2.52E-04      |
| ENSSSCT00000015769 | <i>FBXO38</i>  | 6.48                  | 3.51E-08 | 6.54E-05      |
| ENSSSCT00000043281 | <i>ZNF280D</i> | 6.49                  | 1.08E-06 | 1.18E-03      |
| ENSSSCT00000064492 | <i>ZNF629</i>  | 6.73                  | 2.55E-09 | 6.80E-06      |
| ENSSSCT00000028805 | <i>ZNF583</i>  | 7.34                  | 6.81E-10 | 2.12E-06      |
| ENSSSCT00000030081 | <i>NMNAT1</i>  | 7.50                  | 1.59E-11 | 5.94E-08      |
| ENSSSCT00000039133 | <i>ATG16L1</i> | 7.76                  | 4.16E-09 | 9.69E-06      |
| ENSSSCT00000038377 | <i>RUNDC3B</i> | 8.96                  | 3.72E-16 | 3.47E-12      |

1043

1044 **Table 4.** List of the miRNAs showing distinct seasonal abundance. The list includes  
 1045 only these miRNAs with q-val < 0.05 and log2FC >1.5. FC: Fold-Change; FDR: False  
 1046 Discovery Rate.

| <b>miRNA ID</b> | <b>Log2 (FC)</b> | <b>p-value</b> | <b>q-value (FDR)</b> |
|-----------------|------------------|----------------|----------------------|
| ssc-miR-221-3p  | -2.70            | 4.19E-05       | 1.54E-03             |
| ssc-miR-362     | -1.81            | 1.63E-03       | 2.18E-02             |
| ssc-miR-378     | -1.71            | 6.16E-03       | 4.94E-02             |
| ssc-miR-106a    | -1.62            | 1.75E-05       | 1.29E-03             |
| ssc-miR-34c     | -1.53            | 5.87E-04       | 9.59E-03             |
| ssc-miR-1306-5p | 1.68             | 1.81E-04       | 3.81E-03             |
| ssc-miR-1249    | 3.14             | 2.58E-08       | 3.79E-06             |

1047

1048

1049 **Supplementary Material**

1050 Supplementary\_File\_1.xlsx

1051 RNA-seq quality and mapping statistics.

1052 Average and Standard Deviation (SD) for the 10 boar sperm samples processed,  
 1053 including: amount of RNA extracted and several RNA-seq bioinformatics statistics for  
 1054 both total and small RNA-seq.

1055

1056 Supplementary\_File\_2.xls

1057 Distribution of the top decile most abundant SREs (Sperm RNA Elements) into SRE  
 1058 types and gene biotypes.

1059 Number of SREs (within the top decile) for each SRE type (exonic, intronic,  
 1060 upstream/downstream 10 kb and orphan). Total non-redundant number of genes and  
 1061 their biotype for each SRE class.

1062

1063 Supplementary\_File\_3.xls

1064 List of human and bovine genes identified by syntenic alignment of the orphan SREs.

1065 Orphan SRE genome coordinates were liftover to human and bovine coordinates, and  
 1066 the genes mapped in these regions were extracted. A total of 45 genes shared in both  
 1067 species were found. From these genes, 44 were already annotated in the *Sscrofa*  
 1068 Ensembl v.91 annotation. 17 of these genes were also detected by exonic, intronic  
 1069 and/or upstream / downstream 10 kb SREs. This suggests that orphan SREs could  
 1070 correspond to unannotated isoforms or to paralogous genes.

1071

1072 Supplementary\_File\_4.xls

1073 Gene Ontology analysis of the genes including the top decile most abundant and the  
 1074 orphan SREs detected in the SRE pipeline.

1075 GO biological process terms with significant Bonferroni corrected p-values (p-val <  
 1076 0.05) and their associated genes.

1077

1078 Supplementary\_File\_5.xls

1079 Gene Ontology analysis of the different SRE abundance variance groups.

1080 GO biological process terms with significant Bonferroni corrected p-values (p-val <  
 1081 0.05) and their associated genes.

1082

1083 Supplementary\_File\_6.xls

1084 Correlation between transcript integrity across samples, with transcript abundance and  
1085 coding sequence length.  
1086 Correlation of the TIN (Transcripts Integrity Number) between samples, with the  
1087 transcript abundance and with the coding sequence length of the transcripts.  
1088 This table shows the correlation of the TIN (Transcripts Integrity Number) between  
1089 each pair of samples, the correlation of the TIN with the transcript average abundance in  
1090 FPKM (Fragments per Kilobase per Million mapped reads) across the 10 samples, and  
1091 the correlation of the TIN with the length of coding sequence of the transcripts.  
1092  
1093 Supplementary\_File\_7.xls  
1094 Summary statistics of the *de novo* transcriptome assembly.  
1095 Summary statistics of the Trinity output based on the number of potential novel genes  
1096 and transcripts, and size (in bp) of the contigs based on all transcripts isoforms or based  
1097 only on the longest isoform for each potential gene.  
1098  
1099 Supplementary\_File\_8.xls  
1100 List of proteins identified by *de novo* analysis, with the species in which they were  
1101 detected and transcript abundance.  
1102 *De novo* analysis of the unmapped reads resulted in 1,060 proteins which passed the  
1103 quality control filters (see Methods). For each protein, we include the cognate species,  
1104 the predicted RNA mean abundance in the 10 samples (in FPKM), the Standard  
1105 Deviation (SD) of their RNA abundance and the gene ID symbol retrieved from Uniprot  
1106 (<https://www.uniprot.org/>). FPKM: Fragments per Kilobase per Million mapped reads.  
1107  
1108 Supplementary\_File\_9.xls  
1109 Non-redundant list of genes identified by *de novo* analysis.  
1110 768 potentially novel genes were identified from the unmapped reads. The gene symbol  
1111 IDs were retrieved with Uniprot from the Trinity output protein names. These genes  
1112 were detected in at least one species (detailed in column 2 of Supplementary File 8).  
1113 The majority of these genes were annotated in the porcine Ensembl v.91 but 29 were  
1114 identified as novel genes. 40 of the genes annotated in the porcine genome were not  
1115 detected with the SREs pipeline which indicates that none of their cognate reads  
1116 mapped to the genome even though these genes are annotaed.  
1117  
1118 Supplementary\_File\_10.xls  
1119 List of long non-coding RNAs detected in porcine sperm  
1120 Ensembl IDs of the lncRNAs identified in this study, their genome coordinates, average  
1121 RNA abundance across the 10 samples and length. Most of the lncRNAs presented, as  
1122 an average across all samples, low RNA abundances.  
1123  
1124 Supplementary\_File\_11.xls  
1125 Distribution of the short RNA-seq reads mapping to different RNA types. Proportion  
1126 and Standard Deviation (SD) across the 10 samples.  
1127  
1128 Supplementary\_File\_12.xls  
1129 Concordance of miRNA identification between our dataset and other sperm RNA-seq  
1130 studies.  
1131 Comparison of the miRNAs identified in our study with other sperm RNA-seq  
1132 experiments in pig, in human and cattle.  
1133

1134 Supplementary\_File\_13.xls  
1135 RNA abundance levels and coefficient of variation of miRNAs, tRNAs and piRNAs in  
1136 the porcine sperm.  
1137 RNA abundance is measured in CPM (Counts Per Million) across the 10 samples. We  
1138 only considered the miRNAs with > 0 CPMs in all the samples. The genomic  
1139 coordinates of piRNAs refer to the Sscrofa10.2 built instead of Sscrofa11.1 as provided  
1140 by the piRNAs cluster database [40].  
1141  
1142 Supplementary\_File\_14.xls  
1143 Novel piRNA clusters identified in the pig sperm RNA  
1144 We detected 17 potential clusters of piRNAs that were found in at least 3 of the 10  
1145 samples analysed in this study. Mean and Standard Deviation (SD) in CPM (Counts Per  
1146 Million).



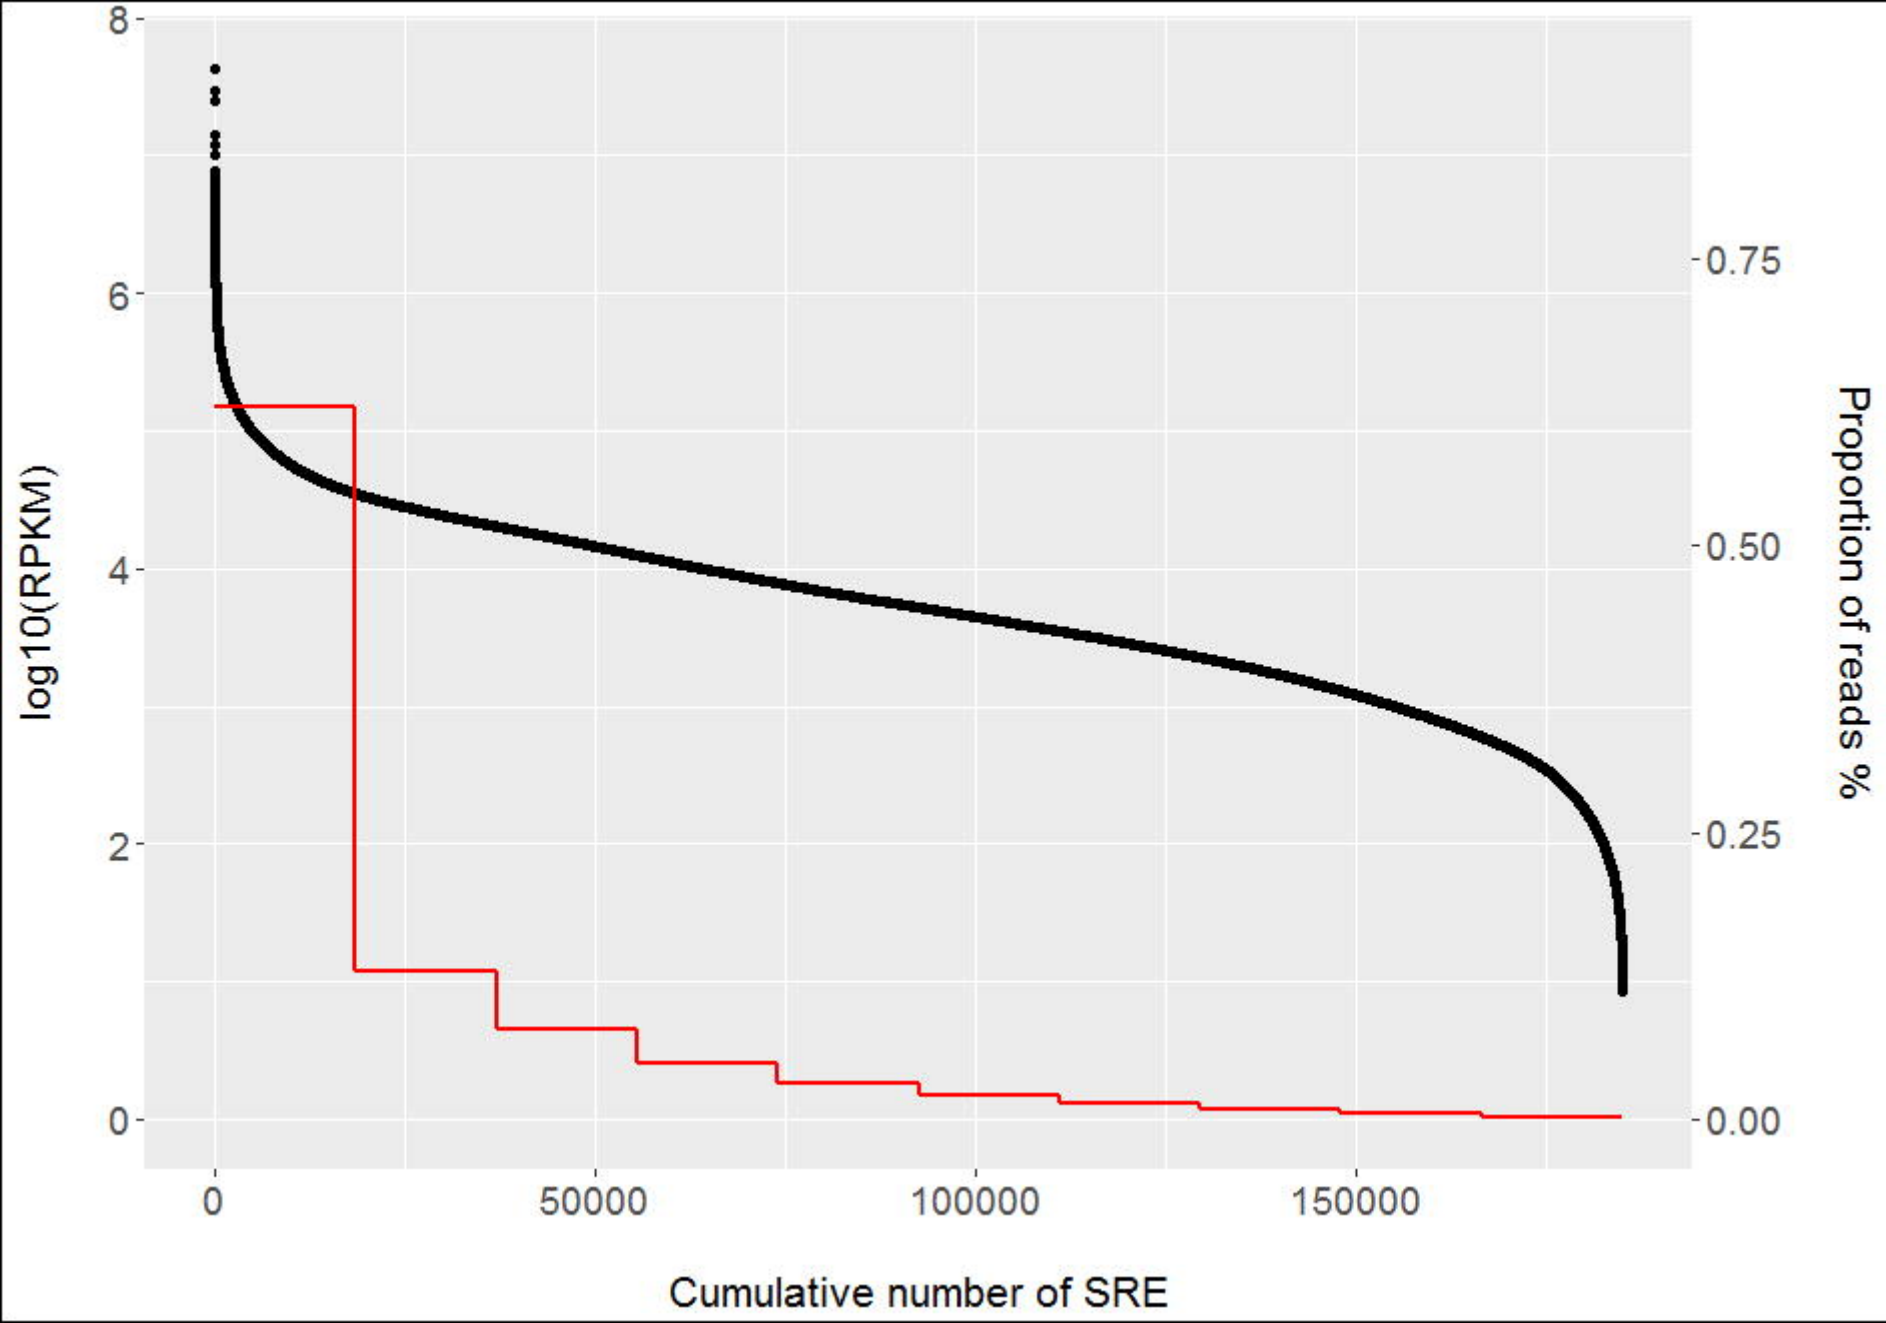

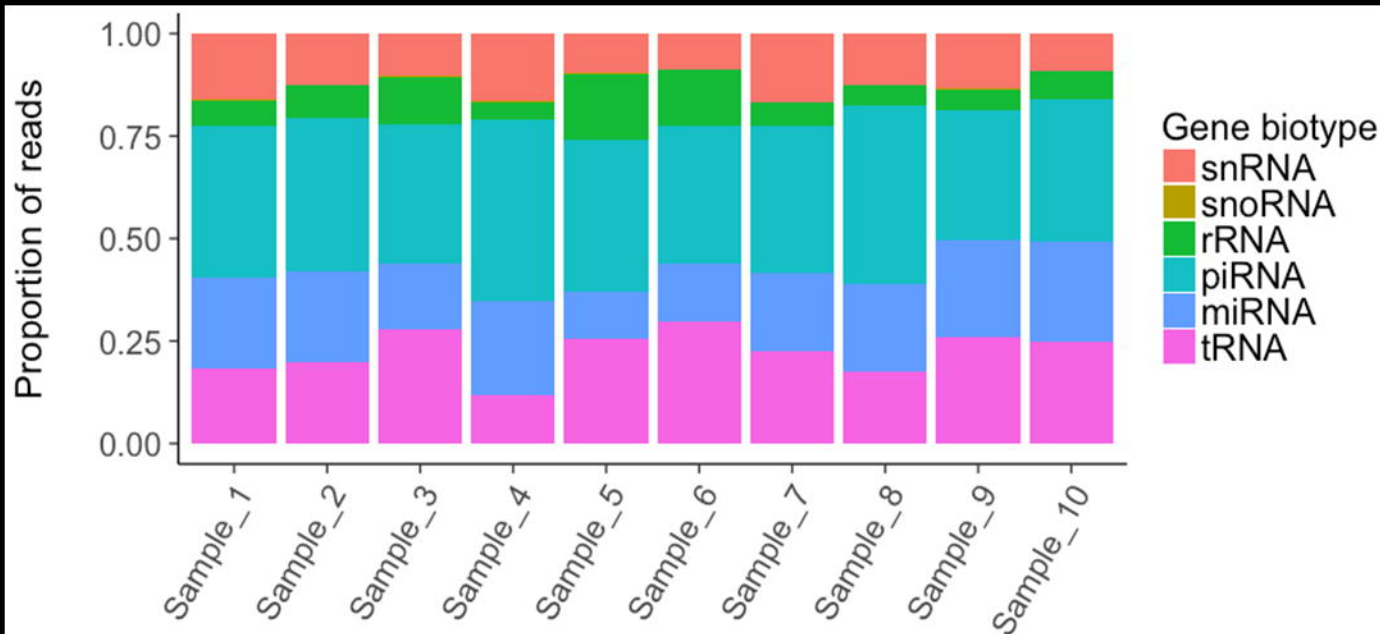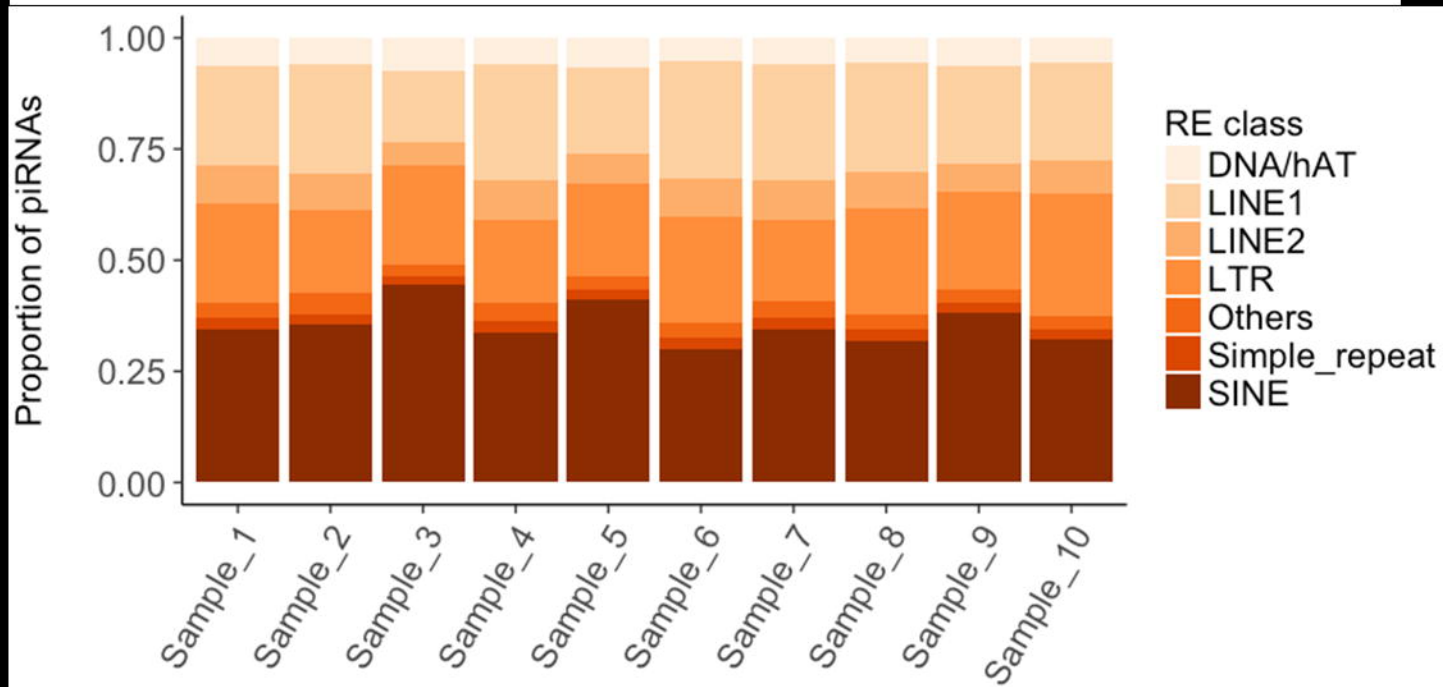

Source: http://biorxiv.org/content/10.1101/506899v1.full.pdf
